# Supplementary material for: Bacterial Diversity and CAZyme Potential Revealed in Pandanus Rich Thermal Spring Cluster of India: A Non-cultivable 16S rRNA Sequencing Approach
Source: Front Microbiol. 2021 Nov 25;12:760573. doi: 10.3389/fmicb.2021.760573 (PMC8656282; doi:10.3389/fmicb.2021.760573)
Supplement: Supplementary file 10 [file Table_5.xlsx]

## Sheet: CAZymes
Table S5 | Prediction of CAZymes among all the samples
KO	EC	CAZyme_catagory	CAZymes_subfamily	SubPathways	Gene.Description	DJ01	DJ02	DJ03	DJ04
K01728	4.2.2.2	CAZymes_PL	PL-1, 2, 3, 9, 10	Pentose and glucuronate interconversions	pectate lyase	0.003	0.002	0	0.005
K01728	4.2.2.2	CAZymes_PL	PL-1, 2, 3, 9, 10	Quorum sensing	pectate lyase	0.003	0.002	0	0.005
K01729	4.2.2.3	CAZymes_PL	PL-5, 6, 7, 8, 14, 15, 17, 18, 31, 32, 36, 41, NC	Fructose and mannose metabolism	poly(beta-D-mannuronate) lyase	0.003	0.002	0.001	0.005
K01730	4.2.2.6	CAZymes_PL	PL-22	Pentose and glucuronate interconversions	oligogalacturonide lyase	0.002	0.001	0	0.003
K08304	4.2.2.-	CAZymes_PL	PL-1, 6, 7, 9, 14, 18, 21, 23, 24, 25, 27, 28, 34, 35, 37, 39, 40	Peptidoglycan biosynthesis and degradation proteins	membrane-bound lytic murein transglycosylase A	0.047	0.04	0.006	0.099
K08305	4.2.2.-	CAZymes_PL	PL-1, 6, 7, 9, 14, 18, 21, 23, 24, 25, 27, 28, 34, 35, 37, 39, 40	Peptidoglycan biosynthesis and degradation proteins	membrane-bound lytic murein transglycosylase B	0.048	0.045	0.008	0.123
K08306	4.2.2.-	CAZymes_PL	PL-1, 6, 7, 9, 14, 18, 21, 23, 24, 25, 27, 28, 34, 35, 37, 39, 40	Peptidoglycan biosynthesis and degradation proteins	membrane-bound lytic murein transglycosylase	0.003	0.003	0	0.007
K08307	4.2.2.-	CAZymes_PL	PL-1, 6, 7, 9, 14, 18, 21, 23, 24, 25, 27, 28, 34, 35, 37, 39, 40	Peptidoglycan biosynthesis and degradation proteins	membrane-bound lytic murein transglycosylase D	0.124	0.097	0.035	0.283
K08308	4.2.2.-	CAZymes_PL	PL-1, 6, 7, 9, 14, 18, 21, 23, 24, 25, 27, 28, 34, 35, 37, 39, 40	Peptidoglycan biosynthesis and degradation proteins	membrane-bound lytic murein transglycosylase	0	0.001	0	0.002
K08309	4.2.2.-	CAZymes_PL	PL-1, 6, 7, 9, 14, 18, 21, 23, 24, 25, 27, 28, 34, 35, 37, 39, 40	Peptidoglycan biosynthesis and degradation proteins	soluble lytic murein transglycosylase	0.144	0.122	0.035	0.331
K18691	4.2.2.-	CAZymes_PL	PL-1, 6, 7, 9, 14, 18, 21, 23, 24, 25, 27, 28, 34, 35, 37, 39, 40	Peptidoglycan biosynthesis and degradation proteins	membrane-bound lytic murein transglycosylase F	0.024	0.022	0.007	0.065
K05841	2.4.1.173	CAZymes_GT	GT-1	Glycosyltransferases	sterol 3beta-glucosyltransferase	0.001	0.001	0.001	0.002
K02844	2.4.1.-	CAZymes_GT	GT-1 ,2 ,4 ,5 ,7 ,8 ,10 ,11 ,13 ,14 ,15 ,21 ,22 ,23 ,24 ,25 ,26 ,28 ,29 ,31 ,32 ,33 ,34 ,37, 40, ,41 ,44	Lipopolysaccharide biosynthesis proteins	UDP-glucose(heptosyl)LPS alpha-1,3-glucosyltransferase	0.03	0.03	0.008	0.073
K02847	2.4.1.-	CAZymes_GT	GT-1 ,2 ,4 ,5 ,7 ,8 ,10 ,11 ,13 ,14 ,15 ,21 ,22 ,23 ,24 ,25 ,26 ,28 ,29 ,31 ,32 ,33 ,34 ,37, 40, ,41 ,45	Lipopolysaccharide biosynthesis	O-antigen ligase	0.003	0.004	0.001	0.009
K02847	2.4.1.-	CAZymes_GT	GT-1 ,2 ,4 ,5 ,7 ,8 ,10 ,11 ,13 ,14 ,15 ,21 ,22 ,23 ,24 ,25 ,26 ,28 ,29 ,31 ,32 ,33 ,34 ,37, 40, ,41 ,46	Lipopolysaccharide biosynthesis proteins	O-antigen ligase	0.003	0.004	0.001	0.009
K02847	2.4.1.-	CAZymes_GT	GT-1 ,2 ,4 ,5 ,7 ,8 ,10 ,11 ,13 ,14 ,15 ,21 ,22 ,23 ,24 ,25 ,26 ,28 ,29 ,31 ,32 ,33 ,34 ,37, 40, ,41 ,47	Transporters	O-antigen ligase	0.003	0.004	0.001	0.009
K03669	2.4.1.-	CAZymes_GT	GT-1 ,2 ,4 ,5 ,7 ,8 ,10 ,11 ,13 ,14 ,15 ,21 ,22 ,23 ,24 ,25 ,26 ,28 ,29 ,31 ,32 ,33 ,34 ,37, 40, ,41 ,48	Glycosyltransferases	membrane glycosyltransferase	0.015	0.012	0.002	0.038
K03867	2.4.1.-	CAZymes_GT	GT-1 ,2 ,4 ,5 ,7 ,8 ,10 ,11 ,13 ,14 ,15 ,21 ,22 ,23 ,24 ,25 ,26 ,28 ,29 ,31 ,32 ,33 ,34 ,37, 40, ,41 ,49	Glycosyltransferases	UDP-glucosetetrahydrobiopterin glucosyltransferase	0.002	0.001	0	0.003
K10211	2.4.1.-	CAZymes_GT	GT-1 ,2 ,4 ,5 ,7 ,8 ,10 ,11 ,13 ,14 ,15 ,21 ,22 ,23 ,24 ,25 ,26 ,28 ,29 ,31 ,32 ,33 ,34 ,37, 40, ,41 ,50	Carotenoid biosynthesis	4,4'-diaponeurosporenoate glycosyltransferase	0.002	0.001	0.001	0.003
K11936	2.4.1.-	CAZymes_GT	GT-1 ,2 ,4 ,5 ,7 ,8 ,10 ,11 ,13 ,14 ,15 ,21 ,22 ,23 ,24 ,25 ,26 ,28 ,29 ,31 ,32 ,33 ,34 ,37, 40, ,41 ,51	Biofilm formation - Escherichia coli	poly-beta-1,6-N-acetyl-D-glucosamine synthase	0.021	0.02	0.006	0.047
K11936	2.4.1.-	CAZymes_GT	GT-1 ,2 ,4 ,5 ,7 ,8 ,10 ,11 ,13 ,14 ,15 ,21 ,22 ,23 ,24 ,25 ,26 ,28 ,29 ,31 ,32 ,33 ,34 ,37, 40, ,41 ,52	Glycosyltransferases	poly-beta-1,6-N-acetyl-D-glucosamine synthase	0.021	0.02	0.006	0.047
K12583	2.4.1.-	CAZymes_GT	GT-1 ,2 ,4 ,5 ,7 ,8 ,10 ,11 ,13 ,14 ,15 ,21 ,22 ,23 ,24 ,25 ,26 ,28 ,29 ,31 ,32 ,33 ,34 ,37, 40, ,41 ,53	Glycosyltransferases	phosphatidylinositol alpha 1,6-mannosyltransferase	0.015	0.011	0.005	0.038
K12984	2.4.1.-	CAZymes_GT	GT-1 ,2 ,4 ,5 ,7 ,8 ,10 ,11 ,13 ,14 ,15 ,21 ,22 ,23 ,24 ,25 ,26 ,28 ,29 ,31 ,32 ,33 ,34 ,37, 40, ,41 ,54	Glycosyltransferases	(heptosyl)LPS beta-1,4-glucosyltransferase	0.028	0.021	0.006	0.058
K12984	2.4.1.-	CAZymes_GT	GT-1 ,2 ,4 ,5 ,7 ,8 ,10 ,11 ,13 ,14 ,15 ,21 ,22 ,23 ,24 ,25 ,26 ,28 ,29 ,31 ,32 ,33 ,34 ,37, 40, ,41 ,55	Lipopolysaccharide biosynthesis proteins	(heptosyl)LPS beta-1,4-glucosyltransferase	0.028	0.021	0.006	0.058
K12988	2.4.1.-	CAZymes_GT	GT-1 ,2 ,4 ,5 ,7 ,8 ,10 ,11 ,13 ,14 ,15 ,21 ,22 ,23 ,24 ,25 ,26 ,28 ,29 ,31 ,32 ,33 ,34 ,37, 40, ,41 ,56	Glycosyltransferases	alpha-1,3-rhamnosyltransferase	0.007	0.006	0.002	0.012
K12988	2.4.1.-	CAZymes_GT	GT-1 ,2 ,4 ,5 ,7 ,8 ,10 ,11 ,13 ,14 ,15 ,21 ,22 ,23 ,24 ,25 ,26 ,28 ,29 ,31 ,32 ,33 ,34 ,37, 40, ,41 ,57	Lipopolysaccharide biosynthesis proteins	alpha-1,3-rhamnosyltransferase	0.007	0.006	0.002	0.012
K12989	2.4.1.-	CAZymes_GT	GT-1 ,2 ,4 ,5 ,7 ,8 ,10 ,11 ,13 ,14 ,15 ,21 ,22 ,23 ,24 ,25 ,26 ,28 ,29 ,31 ,32 ,33 ,34 ,37, 40, ,41 ,58	Glycosyltransferases	mannosyltransferase	0.003	0.003	0.001	0.008
K12989	2.4.1.-	CAZymes_GT	GT-1 ,2 ,4 ,5 ,7 ,8 ,10 ,11 ,13 ,14 ,15 ,21 ,22 ,23 ,24 ,25 ,26 ,28 ,29 ,31 ,32 ,33 ,34 ,37, 40, ,41 ,59	Lipopolysaccharide biosynthesis proteins	mannosyltransferase	0.003	0.003	0.001	0.008
K12990	2.4.1.-	CAZymes_GT	GT-1 ,2 ,4 ,5 ,7 ,8 ,10 ,11 ,13 ,14 ,15 ,21 ,22 ,23 ,24 ,25 ,26 ,28 ,29 ,31 ,32 ,33 ,34 ,37, 40, ,41 ,60	Biofilm formation - Pseudomonas aeruginosa	rhamnosyltransferase	0.002	0.002	0	0.004
K12990	2.4.1.-	CAZymes_GT	GT-1 ,2 ,4 ,5 ,7 ,8 ,10 ,11 ,13 ,14 ,15 ,21 ,22 ,23 ,24 ,25 ,26 ,28 ,29 ,31 ,32 ,33 ,34 ,37, 40, ,41 ,61	Glycosyltransferases	rhamnosyltransferase	0.002	0.002	0	0.004
K12990	2.4.1.-	CAZymes_GT	GT-1 ,2 ,4 ,5 ,7 ,8 ,10 ,11 ,13 ,14 ,15 ,21 ,22 ,23 ,24 ,25 ,26 ,28 ,29 ,31 ,32 ,33 ,34 ,37, 40, ,41 ,62	Lipopolysaccharide biosynthesis proteins	rhamnosyltransferase	0.002	0.002	0	0.004
K12990	2.4.1.-	CAZymes_GT	GT-1 ,2 ,4 ,5 ,7 ,8 ,10 ,11 ,13 ,14 ,15 ,21 ,22 ,23 ,24 ,25 ,26 ,28 ,29 ,31 ,32 ,33 ,34 ,37, 40, ,41 ,63	Quorum sensing	rhamnosyltransferase	0.002	0.002	0	0.004
K12992	2.4.1.-	CAZymes_GT	GT-1 ,2 ,4 ,5 ,7 ,8 ,10 ,11 ,13 ,14 ,15 ,21 ,22 ,23 ,24 ,25 ,26 ,28 ,29 ,31 ,32 ,33 ,34 ,37, 40, ,41 ,64	Biofilm formation - Pseudomonas aeruginosa	rhamnosyltransferase	0.004	0.003	0.001	0.012
K12992	2.4.1.-	CAZymes_GT	GT-1 ,2 ,4 ,5 ,7 ,8 ,10 ,11 ,13 ,14 ,15 ,21 ,22 ,23 ,24 ,25 ,26 ,28 ,29 ,31 ,32 ,33 ,34 ,37, 40, ,41 ,65	Glycosyltransferases	rhamnosyltransferase	0.004	0.003	0.001	0.012
K12992	2.4.1.-	CAZymes_GT	GT-1 ,2 ,4 ,5 ,7 ,8 ,10 ,11 ,13 ,14 ,15 ,21 ,22 ,23 ,24 ,25 ,26 ,28 ,29 ,31 ,32 ,33 ,34 ,37, 40, ,41 ,66	Lipopolysaccharide biosynthesis proteins	rhamnosyltransferase	0.004	0.003	0.001	0.012
K12993	2.4.1.-	CAZymes_GT	GT-1 ,2 ,4 ,5 ,7 ,8 ,10 ,11 ,13 ,14 ,15 ,21 ,22 ,23 ,24 ,25 ,26 ,28 ,29 ,31 ,32 ,33 ,34 ,37, 40, ,41 ,67	Glycosyltransferases	O-antigen biosynthesis alpha-1,2-mannosyltransferase/rhamnosyltransferase	0.003	0.003	0.001	0.006
K12993	2.4.1.-	CAZymes_GT	GT-1 ,2 ,4 ,5 ,7 ,8 ,10 ,11 ,13 ,14 ,15 ,21 ,22 ,23 ,24 ,25 ,26 ,28 ,29 ,31 ,32 ,33 ,34 ,37, 40, ,41 ,68	Lipopolysaccharide biosynthesis proteins	O-antigen biosynthesis alpha-1,2-mannosyltransferase/rhamnosyltransferase	0.003	0.003	0.001	0.006
K12994	2.4.1.-	CAZymes_GT	GT-1 ,2 ,4 ,5 ,7 ,8 ,10 ,11 ,13 ,14 ,15 ,21 ,22 ,23 ,24 ,25 ,26 ,28 ,29 ,31 ,32 ,33 ,34 ,37, 40, ,41 ,69	Glycosyltransferases	mannosyl-N-acetyl-alpha-D-glucosaminyl-diphospho-ditrans,octacis-undecaprenol 3-alpha-mannosyltransferase / alpha-1,3-rhamnosyltransferase	0.045	0.034	0.013	0.091
K12994	2.4.1.-	CAZymes_GT	GT-1 ,2 ,4 ,5 ,7 ,8 ,10 ,11 ,13 ,14 ,15 ,21 ,22 ,23 ,24 ,25 ,26 ,28 ,29 ,31 ,32 ,33 ,34 ,37, 40, ,41 ,70	Lipopolysaccharide biosynthesis proteins	mannosyl-N-acetyl-alpha-D-glucosaminyl-diphospho-ditrans,octacis-undecaprenol 3-alpha-mannosyltransferase / alpha-1,3-rhamnosyltransferase	0.045	0.034	0.013	0.091
K12995	2.4.1.-	CAZymes_GT	GT-1 ,2 ,4 ,5 ,7 ,8 ,10 ,11 ,13 ,14 ,15 ,21 ,22 ,23 ,24 ,25 ,26 ,28 ,29 ,31 ,32 ,33 ,34 ,37, 40, ,41 ,71	Glycosyltransferases	N-acetyl-alpha-D-glucosaminyl-diphospho-ditrans,octacis-undecaprenol 3-alpha-mannosyltransferase / rhamnosyltransferase	0.003	0.003	0.001	0.009
K12995	2.4.1.-	CAZymes_GT	GT-1 ,2 ,4 ,5 ,7 ,8 ,10 ,11 ,13 ,14 ,15 ,21 ,22 ,23 ,24 ,25 ,26 ,28 ,29 ,31 ,32 ,33 ,34 ,37, 40, ,41 ,72	Lipopolysaccharide biosynthesis proteins	N-acetyl-alpha-D-glucosaminyl-diphospho-ditrans,octacis-undecaprenol 3-alpha-mannosyltransferase / rhamnosyltransferase	0.003	0.003	0.001	0.009
K12996	2.4.1.-	CAZymes_GT	GT-1 ,2 ,4 ,5 ,7 ,8 ,10 ,11 ,13 ,14 ,15 ,21 ,22 ,23 ,24 ,25 ,26 ,28 ,29 ,31 ,32 ,33 ,34 ,37, 40, ,41 ,73	Glycosyltransferases	rhamnosyltransferase	0.002	0.001	0	0.003
K12996	2.4.1.-	CAZymes_GT	GT-1 ,2 ,4 ,5 ,7 ,8 ,10 ,11 ,13 ,14 ,15 ,21 ,22 ,23 ,24 ,25 ,26 ,28 ,29 ,31 ,32 ,33 ,34 ,37, 40, ,41 ,74	Lipopolysaccharide biosynthesis proteins	rhamnosyltransferase	0.002	0.001	0	0.003
K12997	2.4.1.-	CAZymes_GT	GT-1 ,2 ,4 ,5 ,7 ,8 ,10 ,11 ,13 ,14 ,15 ,21 ,22 ,23 ,24 ,25 ,26 ,28 ,29 ,31 ,32 ,33 ,34 ,37, 40, ,41 ,75	Glycosyltransferases	rhamnosyltransferase	0.003	0.002	0.001	0.007
K12997	2.4.1.-	CAZymes_GT	GT-1 ,2 ,4 ,5 ,7 ,8 ,10 ,11 ,13 ,14 ,15 ,21 ,22 ,23 ,24 ,25 ,26 ,28 ,29 ,31 ,32 ,33 ,34 ,37, 40, ,41 ,76	Lipopolysaccharide biosynthesis proteins	rhamnosyltransferase	0.003	0.002	0.001	0.007
K12999	2.4.1.-	CAZymes_GT	GT-1 ,2 ,4 ,5 ,7 ,8 ,10 ,11 ,13 ,14 ,15 ,21 ,22 ,23 ,24 ,25 ,26 ,28 ,29 ,31 ,32 ,33 ,34 ,37, 40, ,41 ,77	Glycosyltransferases	glucosyltransferase	0	0	0	0.002
K12999	2.4.1.-	CAZymes_GT	GT-1 ,2 ,4 ,5 ,7 ,8 ,10 ,11 ,13 ,14 ,15 ,21 ,22 ,23 ,24 ,25 ,26 ,28 ,29 ,31 ,32 ,33 ,34 ,37, 40, ,41 ,78	Lipopolysaccharide biosynthesis proteins	glucosyltransferase	0	0	0	0.002
K13002	2.4.1.-	CAZymes_GT	GT-1 ,2 ,4 ,5 ,7 ,8 ,10 ,11 ,13 ,14 ,15 ,21 ,22 ,23 ,24 ,25 ,26 ,28 ,29 ,31 ,32 ,33 ,34 ,37, 40, ,41 ,79	Glycosyltransferases	glycosyltransferase	0.003	0.001	0.001	0.004
K13002	2.4.1.-	CAZymes_GT	GT-1 ,2 ,4 ,5 ,7 ,8 ,10 ,11 ,13 ,14 ,15 ,21 ,22 ,23 ,24 ,25 ,26 ,28 ,29 ,31 ,32 ,33 ,34 ,37, 40, ,41 ,80	Lipopolysaccharide biosynthesis proteins	glycosyltransferase	0.003	0.001	0.001	0.004
K13004	2.4.1.-	CAZymes_GT	GT-1 ,2 ,4 ,5 ,7 ,8 ,10 ,11 ,13 ,14 ,15 ,21 ,22 ,23 ,24 ,25 ,26 ,28 ,29 ,31 ,32 ,33 ,34 ,37, 40, ,41 ,81	Glycosyltransferases	galacturonosyltransferase WbtD	0.002	0.002	0.001	0.006
K13004	2.4.1.-	CAZymes_GT	GT-1 ,2 ,4 ,5 ,7 ,8 ,10 ,11 ,13 ,14 ,15 ,21 ,22 ,23 ,24 ,25 ,26 ,28 ,29 ,31 ,32 ,33 ,34 ,37, 40, ,41 ,82	Lipopolysaccharide biosynthesis proteins	galacturonosyltransferase WbtD	0.002	0.002	0.001	0.006
K13007	2.4.1.-	CAZymes_GT	GT-1 ,2 ,4 ,5 ,7 ,8 ,10 ,11 ,13 ,14 ,15 ,21 ,22 ,23 ,24 ,25 ,26 ,28 ,29 ,31 ,32 ,33 ,34 ,37, 40, ,41 ,83	Glycosyltransferases	Fuc2NAc and GlcNAc transferase	0.013	0.007	0.003	0.021
K13007	2.4.1.-	CAZymes_GT	GT-1 ,2 ,4 ,5 ,7 ,8 ,10 ,11 ,13 ,14 ,15 ,21 ,22 ,23 ,24 ,25 ,26 ,28 ,29 ,31 ,32 ,33 ,34 ,37, 40, ,41 ,84	Lipopolysaccharide biosynthesis proteins	Fuc2NAc and GlcNAc transferase	0.013	0.007	0.003	0.021
K13688	2.4.1.-	CAZymes_GT	GT-1 ,2 ,4 ,5 ,7 ,8 ,10 ,11 ,13 ,14 ,15 ,21 ,22 ,23 ,24 ,25 ,26 ,28 ,29 ,31 ,32 ,33 ,34 ,37, 40, ,41 ,85	Glycosyltransferases	cyclic beta-1,2-glucan synthetase	0.016	0.014	0.003	0.025
K14335	2.4.1.-	CAZymes_GT	GT-1 ,2 ,4 ,5 ,7 ,8 ,10 ,11 ,13 ,14 ,15 ,21 ,22 ,23 ,24 ,25 ,26 ,28 ,29 ,31 ,32 ,33 ,34 ,37, 40, ,41 ,86	Glycosyltransferases	alpha-1,6-mannosyltransferase	0.033	0.025	0.007	0.072
K14335	2.4.1.-	CAZymes_GT	GT-1 ,2 ,4 ,5 ,7 ,8 ,10 ,11 ,13 ,14 ,15 ,21 ,22 ,23 ,24 ,25 ,26 ,28 ,29 ,31 ,32 ,33 ,34 ,37, 40, ,41 ,87	Lipoarabinomannan (LAM) biosynthesis	alpha-1,6-mannosyltransferase	0.033	0.025	0.007	0.072
K19354	2.4.1.-	CAZymes_GT	GT-1 ,2 ,4 ,5 ,7 ,8 ,10 ,11 ,13 ,14 ,15 ,21 ,22 ,23 ,24 ,25 ,26 ,28 ,29 ,31 ,32 ,33 ,34 ,37, 40, ,41 ,88	Glycosyltransferases	heptose III glucuronosyltransferase	0.004	0.005	0.001	0.012
K19354	2.4.1.-	CAZymes_GT	GT-1 ,2 ,4 ,5 ,7 ,8 ,10 ,11 ,13 ,14 ,15 ,21 ,22 ,23 ,24 ,25 ,26 ,28 ,29 ,31 ,32 ,33 ,34 ,37, 40, ,41 ,89	Lipopolysaccharide biosynthesis proteins	heptose III glucuronosyltransferase	0.004	0.005	0.001	0.012
K20444	2.4.1.-	CAZymes_GT	GT-1 ,2 ,4 ,5 ,7 ,8 ,10 ,11 ,13 ,14 ,15 ,21 ,22 ,23 ,24 ,25 ,26 ,28 ,29 ,31 ,32 ,33 ,34 ,37, 40, ,41 ,90	Lipopolysaccharide biosynthesis proteins	O-antigen biosynthesis protein	0.09	0.061	0.017	0.162
K03815	2.4.2.-	CAZymes_GT	GT-1 ,2 ,4 ,8 ,25 ,43 ,47 ,49 ,53 ,61 ,77 ,79 ,85 ,89 ,90 ,95 ,110 ,NC	Purine metabolism	xanthosine phosphorylase	0.002	0.003	0.001	0.007
K12981	2.4.99.-	CAZymes_GT	GT-1 ,4 ,9 ,29 ,30 ,38 ,42 ,73 ,97 ,99 ,100 ,102 ,103 ,107 ,112	Glycosyltransferases	KDO transferase III	0	0	0	0.002
K12981	2.4.99.-	CAZymes_GT	GT-1 ,4 ,9 ,29 ,30 ,38 ,42 ,73 ,97 ,99 ,100 ,102 ,103 ,107 ,112	Lipopolysaccharide biosynthesis	KDO transferase III	0	0	0	0.002
K12981	2.4.99.-	CAZymes_GT	GT-1 ,4 ,9 ,29 ,30 ,38 ,42 ,73 ,97 ,99 ,100 ,102 ,103 ,107 ,112	Lipopolysaccharide biosynthesis proteins	KDO transferase III	0	0	0	0.002
K02844	2.4.1.-	CAZymes_GT	GT-1 2 4 5 7 8 10 11 13 14 15 21 22 23 24 25 26 28 29 31 32 33 34 37 40 41 44	Glycosyltransferases	UDP-glucose(heptosyl)LPS alpha-1,3-glucosyltransferase	0.03	0.03	0.008	0.073
K02844	2.4.1.-	CAZymes_GT	GT-1 2 4 5 7 8 10 11 13 14 15 21 22 23 24 25 26 28 29 31 32 33 34 37 40 41 44	Lipopolysaccharide biosynthesis	UDP-glucose(heptosyl)LPS alpha-1,3-glucosyltransferase	0.03	0.03	0.008	0.073
K00786	2.4.1.-	CAZymes_GT	GT-1 2 4 5 7 8 10 11 13 14 15 21 22 23 24 25 26 28 29 31 32 33 34 37 40 41 44	Glycosyltransferases	beta-1,6-galactosyltransferase	0.008	0.006	0.002	0.017
K02840	2.4.1.-	CAZymes_GT	GT-1 2 4 5 7 8 10 11 13 14 15 21 22 23 24 25 26 28 29 31 32 33 34 37 40 41 44	Glycosyltransferases	UDP-D-galactose(glucosyl)LPS alpha-1,6-D-galactosyltransferase	0.001	0.001	0	0.002
K02840	2.4.1.-	CAZymes_GT	GT-1 2 4 5 7 8 10 11 13 14 15 21 22 23 24 25 26 28 29 31 32 33 34 37 40 41 44	Lipopolysaccharide biosynthesis	UDP-D-galactose(glucosyl)LPS alpha-1,6-D-galactosyltransferase	0.001	0.001	0	0.002
K02840	2.4.1.-	CAZymes_GT	GT-1 2 4 5 7 8 10 11 13 14 15 21 22 23 24 25 26 28 29 31 32 33 34 37 40 41 44	Lipopolysaccharide biosynthesis proteins	UDP-D-galactose(glucosyl)LPS alpha-1,6-D-galactosyltransferase	0.001	0.001	0	0.002
K20534	2.4.-.-	CAZymes_GT	GT-1,43,51,NC	Lipopolysaccharide biosynthesis proteins	polyisoprenyl-phosphate glycosyltransferase	0.166	0.135	0.045	0.331
K02843	2.4.-.-	CAZymes_GT	GT-1,43,51,NC	Glycosyltransferases	heptosyltransferase II	0.046	0.035	0.012	0.083
K02843	2.4.-.-	CAZymes_GT	GT-1,43,51,NC	Lipopolysaccharide biosynthesis	heptosyltransferase II	0.046	0.035	0.012	0.083
K02843	2.4.-.-	CAZymes_GT	GT-1,43,51,NC	Lipopolysaccharide biosynthesis proteins	heptosyltransferase II	0.046	0.035	0.012	0.083
K02841	2.4.-.-	CAZymes_GT	GT-1,43,51,NC	Glycosyltransferases	heptosyltransferase I	0.025	0.02	0.007	0.049
K02841	2.4.-.-	CAZymes_GT	GT-1,43,51,NC	Lipopolysaccharide biosynthesis	heptosyltransferase I	0.025	0.02	0.007	0.049
K02841	2.4.-.-	CAZymes_GT	GT-1,43,51,NC	Lipopolysaccharide biosynthesis proteins	heptosyltransferase I	0.025	0.02	0.007	0.049
K16698	2.4.-.-	CAZymes_GT	GT-1,43,51,NC	Glycosyltransferases	teichuronic acid biosynthesis glycosyltransferase TuaG	0.024	0.019	0.007	0.046
K02849	2.4.-.-	CAZymes_GT	GT-1,43,51,NC	Glycosyltransferases	heptosyltransferase III	0.009	0.009	0.003	0.017
K02849	2.4.-.-	CAZymes_GT	GT-1,43,51,NC	Lipopolysaccharide biosynthesis	heptosyltransferase III	0.009	0.009	0.003	0.017
K02849	2.4.-.-	CAZymes_GT	GT-1,43,51,NC	Lipopolysaccharide biosynthesis proteins	heptosyltransferase III	0.009	0.009	0.003	0.017
K16555	2.4.-.-	CAZymes_GT	GT-1,43,51,NC	Glycosyltransferases	succinoglycan biosynthesis protein xoO	0.005	0.003	0.001	0.012
K13683	2.4.-.-	CAZymes_GT	GT-1,43,51,NC	Glycosyltransferases	putative colanic acid biosynthesis glycosyltransferase	0.004	0.002	0.001	0.006
K16703	2.4.-.-	CAZymes_GT	GT-1,43,51,NC	Glycosyltransferases	colanic acid/amylovoran biosynthesis glycosyltransferase	0.004	0.003	0.001	0.01
K19424	2.4.-.-	CAZymes_GT	GT-1,43,51,NC	Glycosyltransferases	glycosyltransferase psF	0.002	0.002	0.001	0.006
K12982	2.4.-.-	CAZymes_GT	GT-1,43,51,NC	Glycosyltransferases	heptosyltransferase I	0.001	0.001	0.001	0.002
K12982	2.4.-.-	CAZymes_GT	GT-1,43,51,NC	Lipopolysaccharide biosynthesis proteins	heptosyltransferase I	0.001	0.001	0.001	0.002
K16557	2.4.-.-	CAZymes_GT	GT-1,43,51,NC	Glycosyltransferases	succinoglycan biosynthesis protein xoA	0.001	0.001	0	0.003
K19425	2.4.-.-	CAZymes_GT	GT-1,43,51,NC	Glycosyltransferases	glycosyltransferase psH	0.001	0.001	0.001	0.004
K00748	2.4.1.182	CAZymes_GT	GT-19	Glycosyltransferases	lipid-A-disaccharide synthase	0.11	0.076	0.023	0.2
K00748	2.4.1.182	CAZymes_GT	GT-19	Lipopolysaccharide biosynthesis	lipid-A-disaccharide synthase	0.11	0.076	0.023	0.2
K00748	2.4.1.182	CAZymes_GT	GT-19	Lipopolysaccharide biosynthesis proteins	lipid-A-disaccharide synthase	0.11	0.076	0.023	0.2
K00721	2.4.1.83	CAZymes_GT	GT-2	Glycosyltransferases	dolichol-phosphate mannosyltransferase	0.118	0.082	0.035	0.236
K00721	2.4.1.83	CAZymes_GT	GT-2	N-Glycan biosynthesis	dolichol-phosphate mannosyltransferase	0.118	0.082	0.035	0.236
K00694	2.4.1.12	CAZymes_GT	GT-2	Biofilm formation - Escherichia coli	cellulose synthase (UDP-forming)	0.025	0.018	0.005	0.057
K00694	2.4.1.12	CAZymes_GT	GT-2	Glycosyltransferases	cellulose synthase (UDP-forming)	0.025	0.018	0.005	0.057
K00694	2.4.1.12	CAZymes_GT	GT-2	Starch and sucrose metabolism	cellulose synthase (UDP-forming)	0.025	0.018	0.005	0.057
K00752	2.4.1.212	CAZymes_GT	GT-2	Glycosyltransferases	hyaluronan synthase	0.001	0.001	0	0.002
K16870	2.4.1.289	CAZymes_GT	GT-2, 99, 102, 103	Arabinogalactan biosynthesis - Mycobacterium	N-acetylglucosaminyl-diphospho-decaprenol L-rhamnosyltransferase	0.002	0.001	0	0.004
K16870	2.4.1.289	CAZymes_GT	GT-2, 99, 102, 103	Glycosyltransferases	N-acetylglucosaminyl-diphospho-decaprenol L-rhamnosyltransferase	0.002	0.001	0	0.004
K00697	2.4.1.15	CAZymes_GT	GT-20	Glycosyltransferases	trehalose 6-phosphate synthase	0.049	0.039	0.011	0.118
K00697	2.4.1.15	CAZymes_GT	GT-20	Starch and sucrose metabolism	trehalose 6-phosphate synthase	0.049	0.039	0.011	0.118
K01087	3.1.3.12	CAZymes_GT	GT-20	Starch and sucrose metabolism	trehalose 6-phosphate phosphatase	0.039	0.032	0.008	0.097
K16055	2.4.1.15	CAZymes_GT	GT-20	Glycosyltransferases	trehalose 6-phosphate synthase/phosphatase	0.012	0.007	0.003	0.029
K16055	2.4.1.15	CAZymes_GT	GT-20	Starch and sucrose metabolism	trehalose 6-phosphate synthase/phosphatase	0.012	0.007	0.003	0.029
K16055	3.1.3.12	CAZymes_GT	GT-20	Glycosyltransferases	trehalose 6-phosphate synthase/phosphatase	0.012	0.007	0.003	0.029
K16055	3.1.3.12	CAZymes_GT	GT-20	Starch and sucrose metabolism	trehalose 6-phosphate synthase/phosphatase	0.012	0.007	0.003	0.029
K03692	2.4.1.213	CAZymes_GT	GT-20	Global maps only	glucosylglycerol-phosphate synthase	0.001	0	0	0.002
K00720	2.4.1.80	CAZymes_GT	GT-21	Glycosyltransferases	ceramide glucosyltransferase	0.005	0.003	0.001	0.011
K00720	2.4.1.80	CAZymes_GT	GT-21	Sphingolipid metabolism	ceramide glucosyltransferase	0.005	0.003	0.001	0.011
K02563	2.4.1.227	CAZymes_GT	GT-28	Cell cycle - Caulobacter	UDP-N-acetylglucosamine--N-acetylmuramyl-(pentapeptide) pyrophosphoryl-undecaprenol N-acetylglucosamine transferase	0.215	0.169	0.06	0.503
K02563	2.4.1.227	CAZymes_GT	GT-28	Peptidoglycan biosynthesis	UDP-N-acetylglucosamine--N-acetylmuramyl-(pentapeptide) pyrophosphoryl-undecaprenol N-acetylglucosamine transferase	0.215	0.169	0.06	0.503
K02563	2.4.1.227	CAZymes_GT	GT-28	Peptidoglycan biosynthesis and degradation proteins	UDP-N-acetylglucosamine--N-acetylmuramyl-(pentapeptide) pyrophosphoryl-undecaprenol N-acetylglucosamine transferase	0.215	0.169	0.06	0.503
K02563	2.4.1.227	CAZymes_GT	GT-28	Vancomycin resistance	UDP-N-acetylglucosamine--N-acetylmuramyl-(pentapeptide) pyrophosphoryl-undecaprenol N-acetylglucosamine transferase	0.215	0.169	0.06	0.503
K16150	2.4.1.11	CAZymes_GT	GT-3,5	Glycosyltransferases	glycogen synthase	0.003	0.003	0.002	0.01
K16150	2.4.1.11	CAZymes_GT	GT-3,5	Starch and sucrose metabolism	glycogen synthase	0.003	0.003	0.002	0.01
K00688	2.4.1.1	CAZymes_GT	GT-35	Biofilm formation - Escherichia coli	glycogen phosphorylase	0.109	0.08	0.031	0.233
K00688	2.4.1.1	CAZymes_GT	GT-35	Glucagon signaling pathway	glycogen phosphorylase	0.109	0.08	0.031	0.233
K00688	2.4.1.1	CAZymes_GT	GT-35	Insulin resistance	glycogen phosphorylase	0.109	0.08	0.031	0.233
K00688	2.4.1.1	CAZymes_GT	GT-35	Insulin signaling pathway	glycogen phosphorylase	0.109	0.08	0.031	0.233
K00688	2.4.1.1	CAZymes_GT	GT-35	Necroptosis	glycogen phosphorylase	0.109	0.08	0.031	0.233
K00688	2.4.1.1	CAZymes_GT	GT-35	Starch and sucrose metabolism	glycogen phosphorylase	0.109	0.08	0.031	0.233
K00728	2.4.1.109	CAZymes_GT	GT-39,105	Glycosyltransferases	dolichyl-phosphate-mannose-protein mannosyltransferase	0.005	0.003	0.001	0.014
K00728	2.4.1.109	CAZymes_GT	GT-39,105	Mannose type O-glycan biosynthesis	dolichyl-phosphate-mannose-protein mannosyltransferase	0.005	0.003	0.001	0.014
K00728	2.4.1.109	CAZymes_GT	GT-39,105	Other types of O-glycan biosynthesis	dolichyl-phosphate-mannose-protein mannosyltransferase	0.005	0.003	0.001	0.014
K01436	3.5.1.-	CAZymes_GT	GT-4	Peptidases and inhibitors	amidohydrolase	0.136	0.1	0.033	0.323
K21613	3.5.1.-	CAZymes_GT	GT-4	Peptidases and inhibitors	N-acetylcysteine deacetylase	0.059	0.049	0.016	0.172
K08281	3.5.1.-	CAZymes_GT	GT-4	Nicotinate and nicotinamide metabolism	nicotinamidase/pyrazinamidase	0.041	0.044	0.016	0.128
K16148	2.4.1.342	CAZymes_GT	GT-4	Glycosyltransferases	alpha-maltose-1-phosphate synthase	0.019	0.011	0.006	0.032
K16148	2.4.1.342	CAZymes_GT	GT-4	Starch and sucrose metabolism	alpha-maltose-1-phosphate synthase	0.019	0.011	0.006	0.032
K11931	3.5.1.-	CAZymes_GT	GT-4	Biofilm formation - Escherichia coli	poly-beta-1,6-N-acetyl-D-glucosamine N-deacetylase	0.01	0.011	0.003	0.028
K21801	3.5.1.-	CAZymes_GT	GT-4	Tryptophan metabolism	indoleacetamide hydrolase	0.006	0.006	0.002	0.02
K00696	2.4.1.14	CAZymes_GT	GT-4	Starch and sucrose metabolism	sucrose-phosphate synthase	0.003	0.003	0.001	0.007
K18572	3.5.1.-	CAZymes_GT	GT-4	Carbapenem biosynthesis	putative pantetheine hydrolase	0.003	0.002	0.001	0.009
K13014	3.5.1.-	CAZymes_GT	GT-4	Amino sugar and nucleotide sugar metabolism	undecaprenyl phosphate-alpha-L-ara4FN deformylase	0.002	0.002	0	0.005
K13014	3.5.1.-	CAZymes_GT	GT-4	Cationic antimicrobial peptide (CAMP) resistance	undecaprenyl phosphate-alpha-L-ara4FN deformylase	0.002	0.002	0	0.005
K13014	3.5.1.-	CAZymes_GT	GT-4	Lipopolysaccharide biosynthesis proteins	undecaprenyl phosphate-alpha-L-ara4FN deformylase	0.002	0.002	0	0.005
K13057	2.4.1.245	CAZymes_GT	GT-4	Starch and sucrose metabolism	trehalose synthase	0.002	0.002	0.001	0.003
K14665	3.5.1.-	CAZymes_GT	GT-4	Peptidases and inhibitors	amidohydrolase	0.002	0.002	0.001	0.007
K09023	3.5.1.-	CAZymes_GT	GT-4	Pyrimidine metabolism	aminoacrylate hydrolase	0.001	0.001	0	0.007
K00703	2.4.1.21	CAZymes_GT	GT-4,5	Biofilm formation - Escherichia coli	starch synthase	0.112	0.085	0.03	0.234
K00703	2.4.1.21	CAZymes_GT	GT-4,5	Glycosyltransferases	starch synthase	0.112	0.085	0.03	0.234
K00703	2.4.1.21	CAZymes_GT	GT-4,5	Starch and sucrose metabolism	starch synthase	0.112	0.085	0.03	0.234
K09667	2.4.1.255	CAZymes_GT	GT-41,61	Chromosome and associated proteins	protein O-GlcNAc transferase	0.005	0.003	0.001	0.006
K09667	2.4.1.255	CAZymes_GT	GT-41,61	Glycosyltransferases	protein O-GlcNAc transferase	0.005	0.003	0.001	0.006
K09667	2.4.1.255	CAZymes_GT	GT-41,61	Insulin resistance	protein O-GlcNAc transferase	0.005	0.003	0.001	0.006
K09667	2.4.1.255	CAZymes_GT	GT-41,61	Other types of O-glycan biosynthesis	protein O-GlcNAc transferase	0.005	0.003	0.001	0.006
K05366	2.4.1.129	CAZymes_GT	GT-51	beta-Lactam resistance	penicillin-binding protein 1A	0.199	0.156	0.054	0.471
K05366	2.4.1.129	CAZymes_GT	GT-51	Glycosyltransferases	penicillin-binding protein 1A	0.199	0.156	0.054	0.471
K05366	2.4.1.129	CAZymes_GT	GT-51	Peptidoglycan biosynthesis	penicillin-binding protein 1A	0.199	0.156	0.054	0.471
K05366	2.4.1.129	CAZymes_GT	GT-51	Peptidoglycan biosynthesis and degradation proteins	penicillin-binding protein 1A	0.199	0.156	0.054	0.471
K03814	2.4.1.129	CAZymes_GT	GT-51	Glycosyltransferases	monofunctional glycosyltransferase	0.095	0.072	0.021	0.227
K03814	2.4.1.129	CAZymes_GT	GT-51	Peptidoglycan biosynthesis	monofunctional glycosyltransferase	0.095	0.072	0.021	0.227
K03814	2.4.1.129	CAZymes_GT	GT-51	Peptidoglycan biosynthesis and degradation proteins	monofunctional glycosyltransferase	0.095	0.072	0.021	0.227
K05367	2.4.1.129	CAZymes_GT	GT-51	Glycosyltransferases	penicillin-binding protein 1	0.052	0.043	0.012	0.104
K05367	2.4.1.129	CAZymes_GT	GT-51	Peptidoglycan biosynthesis	penicillin-binding protein 1	0.052	0.043	0.012	0.104
K05367	2.4.1.129	CAZymes_GT	GT-51	Peptidoglycan biosynthesis and degradation proteins	penicillin-binding protein 1	0.052	0.043	0.012	0.104
K05365	2.4.1.129	CAZymes_GT	GT-51	Glycosyltransferases	penicillin-binding protein 1B	0.044	0.033	0.011	0.113
K05365	2.4.1.129	CAZymes_GT	GT-51	Peptidoglycan biosynthesis	penicillin-binding protein 1B	0.044	0.033	0.011	0.113
K05365	2.4.1.129	CAZymes_GT	GT-51	Peptidoglycan biosynthesis and degradation proteins	penicillin-binding protein 1B	0.044	0.033	0.011	0.113
K12555	2.4.1.129	CAZymes_GT	GT-51	beta-Lactam resistance	penicillin-binding protein 2A	0.032	0.023	0.011	0.088
K12555	2.4.1.129	CAZymes_GT	GT-51	Glycosyltransferases	penicillin-binding protein 2A	0.032	0.023	0.011	0.088
K12555	2.4.1.129	CAZymes_GT	GT-51	Peptidoglycan biosynthesis	penicillin-binding protein 2A	0.032	0.023	0.011	0.088
K12555	2.4.1.129	CAZymes_GT	GT-51	Peptidoglycan biosynthesis and degradation proteins	penicillin-binding protein 2A	0.032	0.023	0.011	0.088
K21464	2.4.1.129	CAZymes_GT	GT-51	Glycosyltransferases	penicillin-binding protein 2D	0.024	0.021	0.008	0.07
K21464	2.4.1.129	CAZymes_GT	GT-51	Peptidoglycan biosynthesis	penicillin-binding protein 2D	0.024	0.021	0.008	0.07
K21464	2.4.1.129	CAZymes_GT	GT-51	Peptidoglycan biosynthesis and degradation proteins	penicillin-binding protein 2D	0.024	0.021	0.008	0.07
K18770	2.4.1.129	CAZymes_GT	GT-51	Glycosyltransferases	penicillin-binding protein 4	0.001	0.001	0	0.004
K18770	2.4.1.129	CAZymes_GT	GT-51	Peptidoglycan biosynthesis	penicillin-binding protein 4	0.001	0.001	0	0.004
K18770	2.4.1.129	CAZymes_GT	GT-51	Peptidoglycan biosynthesis and degradation proteins	penicillin-binding protein 4	0.001	0.001	0	0.004
K07151	2.4.99.18	CAZymes_GT	GT-66	Glycosyltransferases	dolichyl-diphosphooligosaccharide---protein glycosyltransferase	0.001	0.001	0	0.002
K07151	2.4.99.18	CAZymes_GT	GT-66	N-Glycan biosynthesis	dolichyl-diphosphooligosaccharide---protein glycosyltransferase	0.001	0.001	0	0.002
K07151	2.4.99.18	CAZymes_GT	GT-66	Protein processing in endoplasmic reticulum	dolichyl-diphosphooligosaccharide---protein glycosyltransferase	0.001	0.001	0	0.002
K07151	2.4.99.18	CAZymes_GT	GT-66	Various types of N-glycan biosynthesis	dolichyl-diphosphooligosaccharide---protein glycosyltransferase	0.001	0.001	0	0.002
K01186	3.2.1.18	CAZymes_GT	GT-80	Lysosome	sialidase-1	0.007	0.004	0.002	0.014
K01186	3.2.1.18	CAZymes_GT	GT-80	Other glycan degradation	sialidase-1	0.007	0.004	0.002	0.014
K01186	3.2.1.18	CAZymes_GT	GT-80	Sphingolipid metabolism	sialidase-1	0.007	0.004	0.002	0.014
K13693	2.4.1.266	CAZymes_GT	GT-81	Glycosyltransferases	glucosyl-3-phosphoglycerate synthase	0.006	0.003	0.002	0.016
K07264	2.4.2.43	CAZymes_GT	GT-83	Cationic antimicrobial peptide (CAMP) resistance	4-amino-4-deoxy-L-arabinose transferase	0.002	0.002	0	0.005
K07264	2.4.2.43	CAZymes_GT	GT-83	Glycosyltransferases	4-amino-4-deoxy-L-arabinose transferase	0.002	0.002	0	0.005
K07264	2.4.2.43	CAZymes_GT	GT-83	Lipopolysaccharide biosynthesis	4-amino-4-deoxy-L-arabinose transferase	0.002	0.002	0	0.005
K07264	2.4.2.43	CAZymes_GT	GT-83	Lipopolysaccharide biosynthesis proteins	4-amino-4-deoxy-L-arabinose transferase	0.002	0.002	0	0.005
K07462	3.1.-.-	CAZymes_GT	GT-NC	Base excision repair	single-stranded-DNA-specific exonuclease	0.195	0.156	0.051	0.433
K07462	3.1.-.-	CAZymes_GT	GT-NC	DNA repair and recombination proteins	single-stranded-DNA-specific exonuclease	0.195	0.156	0.051	0.433
K07462	3.1.-.-	CAZymes_GT	GT-NC	Homologous recombination	single-stranded-DNA-specific exonuclease	0.195	0.156	0.051	0.433
K07462	3.1.-.-	CAZymes_GT	GT-NC	Mismatch repair	single-stranded-DNA-specific exonuclease	0.195	0.156	0.051	0.433
K16898	3.1.-.-	CAZymes_GT	GT-NC	DNA repair and recombination proteins	ATP-dependent helicase/nuclease subunit A	0.09	0.071	0.025	0.209
K12574	3.1.-.-	CAZymes_GT	GT-NC	Messenger RNA biogenesis	ribonuclease J	0.067	0.061	0.023	0.2
K12574	3.1.-.-	CAZymes_GT	GT-NC	RNA degradation	ribonuclease J	0.067	0.061	0.023	0.2
K18682	3.1.-.-	CAZymes_GT	GT-NC	Messenger RNA biogenesis	ribonucrease Y	0.049	0.036	0.019	0.094
K18682	3.1.-.-	CAZymes_GT	GT-NC	RNA degradation	ribonucrease Y	0.049	0.036	0.019	0.094
K07171	3.1.-.-	CAZymes_GT	GT-NC	Prokaryotic defense system	mRNA interferase MazF	0.04	0.039	0.012	0.099
K13288	3.1.-.-	CAZymes_GT	GT-NC	Messenger RNA biogenesis	oligoribonuclease	0.029	0.022	0.006	0.074
K13288	3.1.-.-	CAZymes_GT	GT-NC	Ribosome biogenesis	oligoribonuclease	0.029	0.022	0.006	0.074
K13288	3.1.-.-	CAZymes_GT	GT-NC	Ribosome biogenesis in eukaryotes	oligoribonuclease	0.029	0.022	0.006	0.074
K16899	3.1.-.-	CAZymes_GT	GT-NC	DNA repair and recombination proteins	ATP-dependent helicase/nuclease subunit B	0.028	0.032	0.005	0.094
K18828	3.1.-.-	CAZymes_GT	GT-NC	Prokaryotic defense system	tRNA(fMet)-specific endonuclease Vap	0.022	0.018	0.006	0.047
K18828	3.1.-.-	CAZymes_GT	GT-NC	Transfer RNA biogenesis	tRNA(fMet)-specific endonuclease Vap	0.022	0.018	0.006	0.047
K07062	3.1.-.-	CAZymes_GT	GT-NC	Prokaryotic defense system	toxin FitB	0.015	0.011	0.004	0.033
K03698	3.1.-.-	CAZymes_GT	GT-NC	Messenger RNA biogenesis	3'-5' exoribonuclease	0.013	0.014	0.004	0.044
K07458	3.1.-.-	CAZymes_GT	GT-NC	DNA repair and recombination proteins	DNA mismatch endonuclease, patch repair protein	0.01	0.01	0.002	0.025
K19158	3.1.-.-	CAZymes_GT	GT-NC	Prokaryotic defense system	toxin YoeB	0.007	0.005	0.002	0.011
K19166	3.1.-.-	CAZymes_GT	GT-NC	Prokaryotic defense system	mRNA interferase HigB	0.006	0.004	0.001	0.009
K19157	3.1.-.-	CAZymes_GT	GT-NC	Prokaryotic defense system	mRNA interferase YafQ	0.002	0.002	0.001	0.004
K19686	3.1.-.-	CAZymes_GT	GT-NC	Prokaryotic defense system	ribonuclease Vap	0.002	0.002	0.001	0.004
K19155	3.1.-.-	CAZymes_GT	GT-NC	Prokaryotic defense system	toxin YhaV	0.001	0.001	0	0.003
K01207	3.2.1.52	CAZymes_GH	GH- 3 ,5 ,18 ,20 ,84 ,109 ,116	Amino sugar and nucleotide sugar metabolism	beta-N-acetylhexosaminidase	0.137	0.101	0.033	0.306
K12373	3.2.1.52	CAZymes_GH	GH- 3 ,5 ,18 ,20 ,84 ,109 ,116	Amino sugar and nucleotide sugar metabolism	hexosaminidase	0.022	0.013	0.005	0.038
K01183	3.2.1.14	CAZymes_GH	GH-18,19,23,48	Amino sugar and nucleotide sugar metabolism	chitinase	0.021	0.018	0.004	0.042
K01209	3.2.1.55	CAZymes_GH	GH-2 ,3 ,5 ,10 ,39 ,43 ,51 ,54 ,62	Amino sugar and nucleotide sugar metabolism	alpha-L-arabinofuranosidase	0.02	0.015	0.005	0.032
K01198	3.2.1.37	CAZymes_GH	GH-1 2 3 5 10 11 30 39 43 51 52 54 116 120	Amino sugar and nucleotide sugar metabolism	xylan 1,4-beta-xylosidase	0.013	0.013	0.003	0.029
K15921	3.2.1.55	CAZymes_GH	GH-2 ,3 ,5 ,10 ,39 ,43 ,51 ,54 ,62	Amino sugar and nucleotide sugar metabolism	arabinoxylan arabinofuranohydrolase	0.004	0.002	0.001	0.005
K13014	3.5.1.-	CAZymes_GH	GH-153	Amino sugar and nucleotide sugar metabolism	undecaprenyl phosphate-alpha-L-ara4FN deformylase	0.002	0.002	0	0.005
K06880	3.1.1.-	CAZymes_GH	GH-5,106	Antimicrobial resistance genes	erythromycin esterase	0.004	0.004	0.001	0.014
K01195	3.2.1.31	CAZymes_GH	GH-1, 2 ,30 ,79 ,137 ,154 ,169	Ascorbate and aldarate metabolism	beta-glucuronidase	0.003	0.002	0.001	0.006
K01197	3.2.1.35	CAZymes_GH	GH-16,56,84	Bacterial toxins	hyaluronoglucosaminidase	0.001	0	0	0.002
K01207	3.2.1.52	CAZymes_GH	GH- 3 ,5 ,18 ,20 ,84 ,109 ,116	beta-Lactam resistance	beta-N-acetylhexosaminidase	0.137	0.101	0.033	0.306
K00694	2.4.1.12	CAZymes_GH	GH-6	Biofilm formation - Escherichia coli	cellulose synthase (UDP-forming)	0.025	0.018	0.005	0.057
K11931	3.5.1.-	CAZymes_GH	GH-153	Biofilm formation - Escherichia coli	poly-beta-1,6-N-acetyl-D-glucosamine N-deacetylase	0.01	0.011	0.003	0.028
K11936	2.4.1.-	CAZymes_GH	GH-1,3,5,13,16 ,17,20,27,31,32,33,35,39,65,70,72,94,130,NC	Biofilm formation - Escherichia coli	poly-beta-1,6-N-acetyl-D-glucosamine synthase	0.021	0.02	0.006	0.047
K12990	2.4.1.-	CAZymes_GH	GH-1,3,5,13,16 ,17,20,27,31,32,33,35,39,65,70,72,94,130,NC	Biofilm formation - Pseudomonas aeruginosa	rhamnosyltransferase	0.002	0.002	0	0.004
K12992	2.4.1.-	CAZymes_GH	GH-1,3,5,13,16 ,17,20,27,31,32,33,35,39,65,70,72,94,130,NC	Biofilm formation - Pseudomonas aeruginosa	rhamnosyltransferase	0.004	0.003	0.001	0.012
K18572	3.5.1.-	CAZymes_GH	GH-153	Carbapenem biosynthesis	putative pantetheine hydrolase	0.003	0.002	0.001	0.009
K01176	3.2.1.1	CAZymes_GH	GH-13, 14, 57, 119	Carbohydrate digestion and absorption	alpha-amylase	0.046	0.035	0.009	0.112
K10211	2.4.1.-	CAZymes_GH	GH-1,3,5,13,16 ,17,20,27,31,32,33,35,39,65,70,72,94,130,NC	Carotenoid biosynthesis	4,4'-diaponeurosporenoate glycosyltransferase	0.002	0.001	0.001	0.003
K13014	3.5.1.-	CAZymes_GH	GH-153	Cationic antimicrobial peptide (CAMP) resistance	undecaprenyl phosphate-alpha-L-ara4FN deformylase	0.002	0.002	0	0.005
K12373	3.2.1.52	CAZymes_GH	GH- 3 ,5 ,18 ,20 ,84 ,109 ,116	Chaperones and folding catalysts	hexosaminidase	0.022	0.013	0.005	0.038
K05349	3.2.1.21	CAZymes_GH	GH-1,2,3,5	Cyanoamino acid metabolism	beta-glucosidase	0.066	0.049	0.015	0.141
K05350	3.2.1.21	CAZymes_GH	GH-1,2,3,5	Cyanoamino acid metabolism	beta-glucosidase	0.038	0.036	0.01	0.096
K01195	3.2.1.31	CAZymes_GH	GH-1, 2 ,30 ,79 ,137 ,154 ,169	Drug metabolism - other enzymes	beta-glucuronidase	0.003	0.002	0.001	0.006
K00700	2.4.1.18	CAZymes_GH	GH-13,57	Exosome	1,4-alpha-glucan branching enzyme	0.101	0.067	0.022	0.215
K01206	3.2.1.51	CAZymes_GH	GH-29 ,141 ,151 ,NC	Exosome	alpha-L-fucosidase	0.01	0.005	0.003	0.015
K01195	3.2.1.31	CAZymes_GH	GH-1, 2 ,30 ,79 ,137 ,154 ,169	Flavone and flavonol biosynthesis	beta-glucuronidase	0.003	0.002	0.001	0.006
K01218	3.2.1.78	CAZymes_GH	GH-5,9,26,44,45,113,134	Fructose and mannose metabolism	mannan endo-1,4-beta-mannosidase	0.006	0.004	0.002	0.01
K03332	3.2.1.80	CAZymes_GH	GH-32	Fructose and mannose metabolism	fructan beta-fructosidase	0.006	0.004	0.002	0.014
K07046	3.1.1.-	CAZymes_GH	GH-5,106	Fructose and mannose metabolism	L-fuconolactonase	0.012	0.008	0.002	0.021
K19355	3.2.1.78	CAZymes_GH	GH-5,9,26,44,45,113,134	Fructose and mannose metabolism	mannan endo-1,4-beta-mannosidase	0.002	0.001	0	0.002
K01187	3.2.1.20	CAZymes_GH	GH-4,13,31	Galactose metabolism	alpha-glucosidase	0.095	0.072	0.024	0.252
K01182	3.2.1.10	CAZymes_GH	GH-13,31	Galactose metabolism	oligo-1,6-glucosidase	0.038	0.035	0.011	0.133
K01190	3.2.1.23	CAZymes_GH	GH-1 ,2 ,3 ,35 ,39 ,42 ,50 ,147 ,163 ,165 ,NC	Galactose metabolism	beta-galactosidase	0.03	0.022	0.007	0.054
K07407	3.2.1.22	CAZymes_GH	GH-4,27,31,36,57,97,110	Galactose metabolism	alpha-galactosidase	0.024	0.017	0.007	0.045
K12308	3.2.1.23	CAZymes_GH	GH-1 ,2 ,3 ,35 ,39 ,42 ,50 ,147 ,163 ,165 ,NC	Galactose metabolism	beta-galactosidase	0.021	0.016	0.006	0.042
K01193	3.2.1.26	CAZymes_GH	GH-32 ,68 ,100	Galactose metabolism	beta-fructofuranosidase	0.013	0.012	0.003	0.036
K07406	3.2.1.22	CAZymes_GH	GH-4,27,31,36,57,97,110	Galactose metabolism	alpha-galactosidase	0.004	0.005	0.001	0.012
K12111	3.2.1.23	CAZymes_GH	GH-1 ,2 ,3 ,35 ,39 ,42 ,50 ,147 ,163 ,165 ,NC	Galactose metabolism	evolved beta-galactosidase subunit alpha	0.002	0.001	0.001	0.004
K01220	3.2.1.85	CAZymes_GH	GH-1	Galactose metabolism	6-phospho-beta-galactosidase	0.001	0.001	0	0.002
K07406	3.2.1.22	CAZymes_GH	GH-4,27,31,36,57,97,110	Glycerolipid metabolism	alpha-galactosidase	0.004	0.005	0.001	0.012
K07407	3.2.1.22	CAZymes_GH	GH-4,27,31,36,57,97,110	Glycerolipid metabolism	alpha-galactosidase	0.024	0.017	0.007	0.045
K01222	3.2.1.86	CAZymes_GH	GH-1,4	Glycolysis / Gluconeogenesis	6-phospho-beta-glucosidase	0.007	0.007	0.002	0.018
K01223	3.2.1.86	CAZymes_GH	GH-1,4	Glycolysis / Gluconeogenesis	6-phospho-beta-glucosidase	0.024	0.023	0.006	0.056
K01197	3.2.1.35	CAZymes_GH	GH-16,56,84	Glycosaminoglycan binding proteins	hyaluronoglucosaminidase	0.001	0	0	0.002
K01195	3.2.1.31	CAZymes_GH	GH-1, 2 ,30 ,79 ,137 ,154 ,169	Glycosaminoglycan degradation	beta-glucuronidase	0.003	0.002	0.001	0.006
K01197	3.2.1.35	CAZymes_GH	GH-16,56,84	Glycosaminoglycan degradation	hyaluronoglucosaminidase	0.001	0	0	0.002
K01207	3.2.1.52	CAZymes_GH	GH- 3 ,5 ,18 ,20 ,84 ,109 ,116	Glycosaminoglycan degradation	beta-N-acetylhexosaminidase	0.137	0.101	0.033	0.306
K12373	3.2.1.52	CAZymes_GH	GH- 3 ,5 ,18 ,20 ,84 ,109 ,116	Glycosaminoglycan degradation	hexosaminidase	0.022	0.013	0.005	0.038
K12373	3.2.1.52	CAZymes_GH	GH- 3 ,5 ,18 ,20 ,84 ,109 ,116	Glycosphingolipid biosynthesis - ganglio series	hexosaminidase	0.022	0.013	0.005	0.038
K07406	3.2.1.22	CAZymes_GH	GH-4,27,31,36,57,97,110	Glycosphingolipid biosynthesis - globo and isoglobo series	alpha-galactosidase	0.004	0.005	0.001	0.012
K07407	3.2.1.22	CAZymes_GH	GH-4,27,31,36,57,97,110	Glycosphingolipid biosynthesis - globo and isoglobo series	alpha-galactosidase	0.024	0.017	0.007	0.045
K12373	3.2.1.52	CAZymes_GH	GH- 3 ,5 ,18 ,20 ,84 ,109 ,116	Glycosphingolipid biosynthesis - globo and isoglobo series	hexosaminidase	0.022	0.013	0.005	0.038
K01194	3.2.1.28	CAZymes_GH	GH-13,15,37,65	Glycosylphosphatidylinositol (GPI)-anchored proteins	alpha,alpha-trehalase	0.006	0.004	0.001	0.013
K01197	3.2.1.35	CAZymes_GH	GH-16,56,84	Glycosylphosphatidylinositol (GPI)-anchored proteins	hyaluronoglucosaminidase	0.001	0	0	0.002
K00692	2.4.1.10	CAZymes_GH	GH-32,68	Glycosyltransferases	levansucrase	0.001	0.001	0	0.003
K00694	2.4.1.12	CAZymes_GH	GH-6	Glycosyltransferases	cellulose synthase (UDP-forming)	0.025	0.018	0.005	0.057
K00786	2.4.1.-	CAZymes_GH	GH-1,3,5,13,16 ,17,20,27,31,32,33,35,39,65,70,72,94,130,NC	Glycosyltransferases	beta-1,6-galactosyltransferase	0.008	0.006	0.002	0.017
K02840	2.4.1.-	CAZymes_GH	GH-1,3,5,13,16 ,17,20,27,31,32,33,35,39,65,70,72,94,130,NC	Glycosyltransferases	UDP-D-galactose(glucosyl)LPS alpha-1,6-D-galactosyltransferase	0.001	0.001	0	0.002
K02844	2.4.1.-	CAZymes_GH	GH-1,3,5,13,16 ,17,20,27,31,32,33,35,39,65,70,72,94,130,NC	Glycosyltransferases	UDP-glucose(heptosyl)LPS alpha-1,3-glucosyltransferase	0.03	0.03	0.008	0.073
K03669	2.4.1.-	CAZymes_GH	GH-1,3,5,13,16 ,17,20,27,31,32,33,35,39,65,70,72,94,130,NC	Glycosyltransferases	membrane glycosyltransferase	0.015	0.012	0.002	0.038
K03867	2.4.1.-	CAZymes_GH	GH-1,3,5,13,16 ,17,20,27,31,32,33,35,39,65,70,72,94,130,NC	Glycosyltransferases	UDP-glucosetetrahydrobiopterin glucosyltransferase	0.002	0.001	0	0.003
K11936	2.4.1.-	CAZymes_GH	GH-1,3,5,13,16 ,17,20,27,31,32,33,35,39,65,70,72,94,130,NC	Glycosyltransferases	poly-beta-1,6-N-acetyl-D-glucosamine synthase	0.021	0.02	0.006	0.047
K12583	2.4.1.-	CAZymes_GH	GH-1,3,5,13,16 ,17,20,27,31,32,33,35,39,65,70,72,94,130,NC	Glycosyltransferases	phosphatidylinositol alpha 1,6-mannosyltransferase	0.015	0.011	0.005	0.038
K12984	2.4.1.-	CAZymes_GH	GH-1,3,5,13,16 ,17,20,27,31,32,33,35,39,65,70,72,94,130,NC	Glycosyltransferases	(heptosyl)LPS beta-1,4-glucosyltransferase	0.028	0.021	0.006	0.058
K12988	2.4.1.-	CAZymes_GH	GH-1,3,5,13,16 ,17,20,27,31,32,33,35,39,65,70,72,94,130,NC	Glycosyltransferases	alpha-1,3-rhamnosyltransferase	0.007	0.006	0.002	0.012
K12989	2.4.1.-	CAZymes_GH	GH-1,3,5,13,16 ,17,20,27,31,32,33,35,39,65,70,72,94,130,NC	Glycosyltransferases	mannosyltransferase	0.003	0.003	0.001	0.008
K12990	2.4.1.-	CAZymes_GH	GH-1,3,5,13,16 ,17,20,27,31,32,33,35,39,65,70,72,94,130,NC	Glycosyltransferases	rhamnosyltransferase	0.002	0.002	0	0.004
K12992	2.4.1.-	CAZymes_GH	GH-1,3,5,13,16 ,17,20,27,31,32,33,35,39,65,70,72,94,130,NC	Glycosyltransferases	rhamnosyltransferase	0.004	0.003	0.001	0.012
K12993	2.4.1.-	CAZymes_GH	GH-1,3,5,13,16 ,17,20,27,31,32,33,35,39,65,70,72,94,130,NC	Glycosyltransferases	O-antigen biosynthesis alpha-1,2-mannosyltransferase/rhamnosyltransferase	0.003	0.003	0.001	0.006
K12994	2.4.1.-	CAZymes_GH	GH-1,3,5,13,16 ,17,20,27,31,32,33,35,39,65,70,72,94,130,NC	Glycosyltransferases	mannosyl-N-acetyl-alpha-D-glucosaminyl-diphospho-ditrans,octacis-undecaprenol 3-alpha-mannosyltransferase / alpha-1,3-rhamnosyltransferase	0.045	0.034	0.013	0.091
K12995	2.4.1.-	CAZymes_GH	GH-1,3,5,13,16 ,17,20,27,31,32,33,35,39,65,70,72,94,130,NC	Glycosyltransferases	N-acetyl-alpha-D-glucosaminyl-diphospho-ditrans,octacis-undecaprenol 3-alpha-mannosyltransferase / rhamnosyltransferase	0.003	0.003	0.001	0.009
K12996	2.4.1.-	CAZymes_GH	GH-1,3,5,13,16 ,17,20,27,31,32,33,35,39,65,70,72,94,130,NC	Glycosyltransferases	rhamnosyltransferase	0.002	0.001	0	0.003
K12997	2.4.1.-	CAZymes_GH	GH-1,3,5,13,16 ,17,20,27,31,32,33,35,39,65,70,72,94,130,NC	Glycosyltransferases	rhamnosyltransferase	0.003	0.002	0.001	0.007
K12999	2.4.1.-	CAZymes_GH	GH-1,3,5,13,16 ,17,20,27,31,32,33,35,39,65,70,72,94,130,NC	Glycosyltransferases	glucosyltransferase	0	0	0	0.002
K13002	2.4.1.-	CAZymes_GH	GH-1,3,5,13,16 ,17,20,27,31,32,33,35,39,65,70,72,94,130,NC	Glycosyltransferases	glycosyltransferase	0.003	0.001	0.001	0.004
K13004	2.4.1.-	CAZymes_GH	GH-1,3,5,13,16 ,17,20,27,31,32,33,35,39,65,70,72,94,130,NC	Glycosyltransferases	galacturonosyltransferase WbtD	0.002	0.002	0.001	0.006
K13007	2.4.1.-	CAZymes_GH	GH-1,3,5,13,16 ,17,20,27,31,32,33,35,39,65,70,72,94,130,NC	Glycosyltransferases	Fuc2NAc and GlcNAc transferase	0.013	0.007	0.003	0.021
K13688	2.4.1.-	CAZymes_GH	GH-1,3,5,13,16 ,17,20,27,31,32,33,35,39,65,70,72,94,130,NC	Glycosyltransferases	cyclic beta-1,2-glucan synthetase	0.016	0.014	0.003	0.025
K14335	2.4.1.-	CAZymes_GH	GH-1,3,5,13,16 ,17,20,27,31,32,33,35,39,65,70,72,94,130,NC	Glycosyltransferases	alpha-1,6-mannosyltransferase	0.033	0.025	0.007	0.072
K19354	2.4.1.-	CAZymes_GH	GH-1,3,5,13,16 ,17,20,27,31,32,33,35,39,65,70,72,94,130,NC	Glycosyltransferases	heptose III glucuronosyltransferase	0.004	0.005	0.001	0.012
K14335	2.4.1.-	CAZymes_GH	GH-1,3,5,13,16 ,17,20,27,31,32,33,35,39,65,70,72,94,130,NC	Lipoarabinomannan (LAM) biosynthesis	alpha-1,6-mannosyltransferase	0.033	0.025	0.007	0.072
K02840	2.4.1.-	CAZymes_GH	GH-1,3,5,13,16 ,17,20,27,31,32,33,35,39,65,70,72,94,130,NC	Lipopolysaccharide biosynthesis	UDP-D-galactose(glucosyl)LPS alpha-1,6-D-galactosyltransferase	0.001	0.001	0	0.002
K02844	2.4.1.-	CAZymes_GH	GH-1,3,5,13,16 ,17,20,27,31,32,33,35,39,65,70,72,94,130,NC	Lipopolysaccharide biosynthesis	UDP-glucose(heptosyl)LPS alpha-1,3-glucosyltransferase	0.03	0.03	0.008	0.073
K02847	2.4.1.-	CAZymes_GH	GH-1,3,5,13,16 ,17,20,27,31,32,33,35,39,65,70,72,94,130,NC	Lipopolysaccharide biosynthesis	O-antigen ligase	0.003	0.004	0.001	0.009
K12976	3.1.1.-	CAZymes_GH	GH-5,106	Lipopolysaccharide biosynthesis	lipid A 3-O-deacylase	0.001	0.001	0	0.004
K02840	2.4.1.-	CAZymes_GH	GH-1,3,5,13,16 ,17,20,27,31,32,33,35,39,65,70,72,94,130,NC	Lipopolysaccharide biosynthesis proteins	UDP-D-galactose(glucosyl)LPS alpha-1,6-D-galactosyltransferase	0.001	0.001	0	0.002
K02844	2.4.1.-	CAZymes_GH	GH-1,3,5,13,16 ,17,20,27,31,32,33,35,39,65,70,72,94,130,NC	Lipopolysaccharide biosynthesis proteins	UDP-glucose(heptosyl)LPS alpha-1,3-glucosyltransferase	0.03	0.03	0.008	0.073
K02847	2.4.1.-	CAZymes_GH	GH-1,3,5,13,16 ,17,20,27,31,32,33,35,39,65,70,72,94,130,NC	Lipopolysaccharide biosynthesis proteins	O-antigen ligase	0.003	0.004	0.001	0.009
K12976	3.1.1.-	CAZymes_GH	GH-5,106	Lipopolysaccharide biosynthesis proteins	lipid A 3-O-deacylase	0.001	0.001	0	0.004
K12984	2.4.1.-	CAZymes_GH	GH-1,3,5,13,16 ,17,20,27,31,32,33,35,39,65,70,72,94,130,NC	Lipopolysaccharide biosynthesis proteins	(heptosyl)LPS beta-1,4-glucosyltransferase	0.028	0.021	0.006	0.058
K12988	2.4.1.-	CAZymes_GH	GH-1,3,5,13,16 ,17,20,27,31,32,33,35,39,65,70,72,94,130,NC	Lipopolysaccharide biosynthesis proteins	alpha-1,3-rhamnosyltransferase	0.007	0.006	0.002	0.012
K12989	2.4.1.-	CAZymes_GH	GH-1,3,5,13,16 ,17,20,27,31,32,33,35,39,65,70,72,94,130,NC	Lipopolysaccharide biosynthesis proteins	mannosyltransferase	0.003	0.003	0.001	0.008
K12990	2.4.1.-	CAZymes_GH	GH-1,3,5,13,16 ,17,20,27,31,32,33,35,39,65,70,72,94,130,NC	Lipopolysaccharide biosynthesis proteins	rhamnosyltransferase	0.002	0.002	0	0.004
K12992	2.4.1.-	CAZymes_GH	GH-1,3,5,13,16 ,17,20,27,31,32,33,35,39,65,70,72,94,130,NC	Lipopolysaccharide biosynthesis proteins	rhamnosyltransferase	0.004	0.003	0.001	0.012
K12993	2.4.1.-	CAZymes_GH	GH-1,3,5,13,16 ,17,20,27,31,32,33,35,39,65,70,72,94,130,NC	Lipopolysaccharide biosynthesis proteins	O-antigen biosynthesis alpha-1,2-mannosyltransferase/rhamnosyltransferase	0.003	0.003	0.001	0.006
K12994	2.4.1.-	CAZymes_GH	GH-1,3,5,13,16 ,17,20,27,31,32,33,35,39,65,70,72,94,130,NC	Lipopolysaccharide biosynthesis proteins	mannosyl-N-acetyl-alpha-D-glucosaminyl-diphospho-ditrans,octacis-undecaprenol 3-alpha-mannosyltransferase / alpha-1,3-rhamnosyltransferase	0.045	0.034	0.013	0.091
K12995	2.4.1.-	CAZymes_GH	GH-1,3,5,13,16 ,17,20,27,31,32,33,35,39,65,70,72,94,130,NC	Lipopolysaccharide biosynthesis proteins	N-acetyl-alpha-D-glucosaminyl-diphospho-ditrans,octacis-undecaprenol 3-alpha-mannosyltransferase / rhamnosyltransferase	0.003	0.003	0.001	0.009
K12996	2.4.1.-	CAZymes_GH	GH-1,3,5,13,16 ,17,20,27,31,32,33,35,39,65,70,72,94,130,NC	Lipopolysaccharide biosynthesis proteins	rhamnosyltransferase	0.002	0.001	0	0.003
K12997	2.4.1.-	CAZymes_GH	GH-1,3,5,13,16 ,17,20,27,31,32,33,35,39,65,70,72,94,130,NC	Lipopolysaccharide biosynthesis proteins	rhamnosyltransferase	0.003	0.002	0.001	0.007
K12999	2.4.1.-	CAZymes_GH	GH-1,3,5,13,16 ,17,20,27,31,32,33,35,39,65,70,72,94,130,NC	Lipopolysaccharide biosynthesis proteins	glucosyltransferase	0	0	0	0.002
K13002	2.4.1.-	CAZymes_GH	GH-1,3,5,13,16 ,17,20,27,31,32,33,35,39,65,70,72,94,130,NC	Lipopolysaccharide biosynthesis proteins	glycosyltransferase	0.003	0.001	0.001	0.004
K13004	2.4.1.-	CAZymes_GH	GH-1,3,5,13,16 ,17,20,27,31,32,33,35,39,65,70,72,94,130,NC	Lipopolysaccharide biosynthesis proteins	galacturonosyltransferase WbtD	0.002	0.002	0.001	0.006
K13007	2.4.1.-	CAZymes_GH	GH-1,3,5,13,16 ,17,20,27,31,32,33,35,39,65,70,72,94,130,NC	Lipopolysaccharide biosynthesis proteins	Fuc2NAc and GlcNAc transferase	0.013	0.007	0.003	0.021
K13014	3.5.1.-	CAZymes_GH	GH-153	Lipopolysaccharide biosynthesis proteins	undecaprenyl phosphate-alpha-L-ara4FN deformylase	0.002	0.002	0	0.005
K19354	2.4.1.-	CAZymes_GH	GH-1,3,5,13,16 ,17,20,27,31,32,33,35,39,65,70,72,94,130,NC	Lipopolysaccharide biosynthesis proteins	heptose III glucuronosyltransferase	0.004	0.005	0.001	0.012
K20444	2.4.1.-	CAZymes_GH	GH-1,3,5,13,16 ,17,20,27,31,32,33,35,39,65,70,72,94,130,NC	Lipopolysaccharide biosynthesis proteins	O-antigen biosynthesis protein	0.09	0.061	0.017	0.162
K01186	3.2.1.18	CAZymes_GH	GH-1,33,34,83,156,NC	Lysosome	sialidase-1	0.007	0.004	0.002	0.014
K01192	3.2.1.25	CAZymes_GH	GH-1 ,2 ,5 ,113 ,164	Lysosome	beta-mannosidase	0.012	0.007	0.003	0.019
K01195	3.2.1.31	CAZymes_GH	GH-1, 2 ,30 ,79 ,137 ,154 ,169	Lysosome	beta-glucuronidase	0.003	0.002	0.001	0.006
K01197	3.2.1.35	CAZymes_GH	GH-16,56,84	Lysosome	hyaluronoglucosaminidase	0.001	0	0	0.002
K01201	3.2.1.45	CAZymes_GH	GH- 3 ,5 ,30 ,116	Lysosome	glucosylceramidase	0.006	0.003	0.001	0.011
K01206	3.2.1.51	CAZymes_GH	GH-29 ,141 ,151 ,NC	Lysosome	alpha-L-fucosidase	0.01	0.005	0.003	0.015
K12373	3.2.1.52	CAZymes_GH	GH- 3 ,5 ,18 ,20 ,84 ,109 ,116	Lysosome	hexosaminidase	0.022	0.013	0.005	0.038
K01191	3.2.1.24	CAZymes_GH	GH-31 ,38 ,92	Membrane trafficking	alpha-mannosidase	0.009	0.007	0.003	0.016
K08281	3.5.1.-	CAZymes_GH	GH-153	Nicotinate and nicotinamide metabolism	nicotinamidase/pyrazinamidase	0.041	0.044	0.016	0.128
K01186	3.2.1.18	CAZymes_GH	GH-1,33,34,83,156,NC	Other glycan degradation	sialidase-1	0.007	0.004	0.002	0.014
K01190	3.2.1.23	CAZymes_GH	GH-1 ,2 ,3 ,35 ,39 ,42 ,50 ,147 ,163 ,165 ,NC	Other glycan degradation	beta-galactosidase	0.03	0.022	0.007	0.054
K01191	3.2.1.24	CAZymes_GH	GH-31 ,38 ,92	Other glycan degradation	alpha-mannosidase	0.009	0.007	0.003	0.016
K01192	3.2.1.25	CAZymes_GH	GH-1 ,2 ,5 ,113 ,164	Other glycan degradation	beta-mannosidase	0.012	0.007	0.003	0.019
K01201	3.2.1.45	CAZymes_GH	GH- 3 ,5 ,30 ,116	Other glycan degradation	glucosylceramidase	0.006	0.003	0.001	0.011
K01206	3.2.1.51	CAZymes_GH	GH-29 ,141 ,151 ,NC	Other glycan degradation	alpha-L-fucosidase	0.01	0.005	0.003	0.015
K01227	3.2.1.96	CAZymes_GH	GH-18 20 73 85	Other glycan degradation	mannosyl-glycoprotein endo-beta-N-acetylglucosaminidase	0	0.001	0	0.004
K12111	3.2.1.23	CAZymes_GH	GH-1 ,2 ,3 ,35 ,39 ,42 ,50 ,147 ,163 ,165 ,NC	Other glycan degradation	evolved beta-galactosidase subunit alpha	0.002	0.001	0.001	0.004
K12373	3.2.1.52	CAZymes_GH	GH- 3 ,5 ,18 ,20 ,84 ,109 ,116	Other glycan degradation	hexosaminidase	0.022	0.013	0.005	0.038
K15923	3.2.1.51	CAZymes_GH	GH-29 ,141 ,151 ,NC	Other glycan degradation	alpha-L-fucosidase 2	0.009	0.005	0.003	0.011
K01176	3.2.1.1	CAZymes_GH	GH-13, 14, 57, 119	Pancreatic secretion	alpha-amylase	0.046	0.035	0.009	0.112
K01195	3.2.1.31	CAZymes_GH	GH-1, 2 ,30 ,79 ,137 ,154 ,169	Pentose and glucuronate interconversions	beta-glucuronidase	0.003	0.002	0.001	0.006
K01436	3.5.1.-	CAZymes_GH	GH-153	Peptidases and inhibitors	amidohydrolase	0.136	0.1	0.033	0.323
K14665	3.5.1.-	CAZymes_GH	GH-153	Peptidases and inhibitors	amidohydrolase	0.002	0.002	0.001	0.007
K21613	3.5.1.-	CAZymes_GH	GH-153	Peptidases and inhibitors	N-acetylcysteine deacetylase	0.059	0.049	0.016	0.172
K05349	3.2.1.21	CAZymes_GH	GH-1,2,3,5	Phenylpropanoid biosynthesis	beta-glucosidase	0.066	0.049	0.015	0.141
K05350	3.2.1.21	CAZymes_GH	GH-1,2,3,5	Phenylpropanoid biosynthesis	beta-glucosidase	0.038	0.036	0.01	0.096
K01195	3.2.1.31	CAZymes_GH	GH-1, 2 ,30 ,79 ,137 ,154 ,169	Porphyrin and chlorophyll metabolism	beta-glucuronidase	0.003	0.002	0.001	0.006
K03815	2.4.2.-	CAZymes_GH	GH-10	Purine metabolism	xanthosine phosphorylase	0.002	0.003	0.001	0.007
K07127	3.5.2.17	CAZymes_GH	GH-1	Purine metabolism	5-hydroxyisourate hydrolase	0.032	0.026	0.006	0.093
K09023	3.5.1.-	CAZymes_GH	GH-153	Pyrimidine metabolism	aminoacrylate hydrolase	0.001	0.001	0	0.007
K01218	3.2.1.78	CAZymes_GH	GH-5,9,26,44,45,113,134	Quorum sensing	mannan endo-1,4-beta-mannosidase	0.006	0.004	0.002	0.01
K12990	2.4.1.-	CAZymes_GH	GH-1,3,5,13,16 ,17,20,27,31,32,33,35,39,65,70,72,94,130,NC	Quorum sensing	rhamnosyltransferase	0.002	0.002	0	0.004
K01176	3.2.1.1	CAZymes_GH	GH-13, 14, 57, 119	Salivary secretion	alpha-amylase	0.046	0.035	0.009	0.112
K01186	3.2.1.18	CAZymes_GH	GH-1,33,34,83,156,NC	Sphingolipid metabolism	sialidase-1	0.007	0.004	0.002	0.014
K01190	3.2.1.23	CAZymes_GH	GH-1 ,2 ,3 ,35 ,39 ,42 ,50 ,147 ,163 ,165 ,NC	Sphingolipid metabolism	beta-galactosidase	0.03	0.022	0.007	0.054
K01201	3.2.1.45	CAZymes_GH	GH- 3 ,5 ,30 ,116	Sphingolipid metabolism	glucosylceramidase	0.006	0.003	0.001	0.011
K07406	3.2.1.22	CAZymes_GH	GH-4,27,31,36,57,97,110	Sphingolipid metabolism	alpha-galactosidase	0.004	0.005	0.001	0.012
K07407	3.2.1.22	CAZymes_GH	GH-1 ,2 ,3 ,35 ,39 ,42 ,50 ,147 ,163 ,165 ,NC	Sphingolipid metabolism	alpha-galactosidase	0.024	0.017	0.007	0.045
K01200	3.2.1.41	CAZymes_GH	GH- 13, 57	Starch and sucrose metabolism	pullulanase	0.01	0.007	0.003	0.023
K05349	3.2.1.21	CAZymes_GH	GH-1,2,3,5	Starch and sucrose metabolism	beta-glucosidase	0.066	0.049	0.015	0.141
K05350	3.2.1.21	CAZymes_GH	GH-1,2,3,5	Starch and sucrose metabolism	beta-glucosidase	0.038	0.036	0.01	0.096
K01223	3.2.1.86	CAZymes_GH	GH-1,4	Starch and sucrose metabolism	6-phospho-beta-glucosidase	0.024	0.023	0.006	0.056
K01222	3.2.1.86	CAZymes_GH	GH-1,4	Starch and sucrose metabolism	6-phospho-beta-glucosidase	0.007	0.007	0.002	0.018
K05343	5.4.99.16	CAZymes_GH	GH-13	Starch and sucrose metabolism	maltose alpha-D-glucosyltransferase / alpha-amylase	0.066	0.044	0.016	0.159
K01236	3.2.1.141	CAZymes_GH	GH-13	Starch and sucrose metabolism	maltooligosyltrehalose trehalohydrolase	0.04	0.03	0.011	0.093
K01226	3.2.1.93	CAZymes_GH	GH-13	Starch and sucrose metabolism	trehalose-6-phosphate hydrolase	0.037	0.035	0.01	0.116
K01208	3.2.1.133	CAZymes_GH	GH-13	Starch and sucrose metabolism	cyclomaltodextrinase / maltogenic alpha-amylase / neopullulanase	0.032	0.025	0.01	0.078
K01208	3.2.1.135	CAZymes_GH	GH-13	Starch and sucrose metabolism	cyclomaltodextrinase / maltogenic alpha-amylase / neopullulanase	0.032	0.025	0.01	0.078
K06044	5.4.99.15	CAZymes_GH	GH-13	Starch and sucrose metabolism	(1->4)-alpha-D-glucan 1-alpha-D-glucosylmutase	0.027	0.018	0.005	0.057
K16147	2.4.99.16	CAZymes_GH	GH-13	Starch and sucrose metabolism	starch synthase (maltosyl-transferring)	0.013	0.007	0.003	0.029
K05341	2.4.1.4	CAZymes_GH	GH-13	Starch and sucrose metabolism	amylosucrase	0.003	0.002	0.001	0.005
K00690	2.4.1.7	CAZymes_GH	GH-13	Starch and sucrose metabolism	sucrose phosphorylase	0.001	0.001	0	0.005
K05343	3.2.1.1	CAZymes_GH	GH-13, 14, 57, 119	Starch and sucrose metabolism	maltose alpha-D-glucosyltransferase / alpha-amylase	0.066	0.044	0.016	0.159
K01176	3.2.1.1	CAZymes_GH	GH-13, 14, 57, 119	Starch and sucrose metabolism	alpha-amylase	0.046	0.035	0.009	0.112
K01194	3.2.1.28	CAZymes_GH	GH-13,15,37,65	Starch and sucrose metabolism	alpha,alpha-trehalase	0.006	0.004	0.001	0.013
K01182	3.2.1.10	CAZymes_GH	GH-13,31	Starch and sucrose metabolism	oligo-1,6-glucosidase	0.038	0.035	0.011	0.133
K00700	2.4.1.18	CAZymes_GH	GH-13,57	Starch and sucrose metabolism	1,4-alpha-glucan branching enzyme	0.101	0.067	0.022	0.215
K01208	3.2.1.54	CAZymes_GH	GH-13,57	Starch and sucrose metabolism	cyclomaltodextrinase / maltogenic alpha-amylase / neopullulanase	0.032	0.025	0.01	0.078
K16149	2.4.1.18	CAZymes_GH	GH-13,57	Starch and sucrose metabolism	1,4-alpha-glucan branching enzyme	0.008	0.005	0.003	0.019
K00705	2.4.1.25	CAZymes_GH	GH-13,57,77,133	Starch and sucrose metabolism	4-alpha-glucanotransferase	0.079	0.056	0.023	0.164
K01178	3.2.1.3	CAZymes_GH	GH-15,97	Starch and sucrose metabolism	glucoamylase	0.022	0.014	0.005	0.045
K21574	3.2.1.3	CAZymes_GH	GH-15,97	Starch and sucrose metabolism	glucan 1,4-alpha-glucosidase	0.003	0.001	0.001	0.004
K01193	3.2.1.26	CAZymes_GH	GH-32 ,68 ,100	Starch and sucrose metabolism	beta-fructofuranosidase	0.013	0.012	0.003	0.036
K00692	2.4.1.10	CAZymes_GH	GH-32,68	Starch and sucrose metabolism	levansucrase	0.001	0.001	0	0.003
K01232	3.2.1.122	CAZymes_GH	GH-4	Starch and sucrose metabolism	maltose-6'-phosphate glucosidase	0	0.001	0	0.004
K01187	3.2.1.20	CAZymes_GH	GH-4,13,31	Starch and sucrose metabolism	alpha-glucosidase	0.095	0.072	0.024	0.252
K01210	3.2.1.58	CAZymes_GH	GH-5 16 55	Starch and sucrose metabolism	glucan 1,3-beta-glucosidase	0.001	0.001	0	0.002
K01179	3.2.1.4	CAZymes_GH	GH-5 6 7 8 9 10 12 26 44 45 48 51 74 124 148 NC	Starch and sucrose metabolism	endoglucanase	0.041	0.029	0.009	0.07
K19668	3.2.1.91	CAZymes_GH	GH-5,6,9	Starch and sucrose metabolism	cellulose 1,4-beta-cellobiosidase	0.001	0.001	0	0.002
K00694	2.4.1.12	CAZymes_GH	GH-6	Starch and sucrose metabolism	cellulose synthase (UDP-forming)	0.025	0.018	0.005	0.057
K05342	2.4.1.64	CAZymes_GH	GH-64	Starch and sucrose metabolism	alpha,alpha-trehalose phosphorylase	0.006	0.004	0.002	0.013
K00691	2.4.1.8	CAZymes_GH	GH-65	Starch and sucrose metabolism	maltose phosphorylase	0.005	0.002	0.001	0.006
K01214	3.2.1.68	CAZymes_GH	GH-68	Starch and sucrose metabolism	isoamylase	0.058	0.043	0.014	0.136
K00702	2.4.1.20	CAZymes_GH	GH-94	Starch and sucrose metabolism	cellobiose phosphorylase	0.002	0.001	0.001	0.002
K07050	3.1.1.-	CAZymes_GH	GH-5,106	Transfer RNA biogenesis	misacylated tRNA(Ala) deacylase	0.005	0.005	0.001	0.016
K19055	3.1.1.-	CAZymes_GH	GH-5,106	Transfer RNA biogenesis	Ala-tRNA(Pro) deacylase	0.013	0.012	0.002	0.032
K02847	2.4.1.-	CAZymes_GH	GH-1,3,5,13,16 ,17,20,27,31,32,33,35,39,65,70,72,94,130,NC	Transporters	O-antigen ligase	0.003	0.004	0.001	0.009
K07127	3.5.2.17	CAZymes_GH	GH-1	Transporters	5-hydroxyisourate hydrolase	0.032	0.026	0.006	0.093
K21801	3.5.1.-	CAZymes_GH	GH-153	Tryptophan metabolism	indoleacetamide hydrolase	0.006	0.006	0.002	0.02
K00692	2.4.1.10	CAZymes_GH	GH-32,68	Two-component system	levansucrase	0.001	0.001	0	0.003
K01179	3.2.1.4	CAZymes_GH	GH-5 6 7 8 9 10 12 26 44 45 48 51 74 124 148 NC	Two-component system	endoglucanase	0.041	0.029	0.009	0.07
K19668	3.2.1.91	CAZymes_GH	GH-5,6,9	Two-component system	cellulose 1,4-beta-cellobiosidase	0.001	0.001	0	0.002
K12373	3.2.1.52	CAZymes_GH	GH- 3 ,5 ,18 ,20 ,84 ,109 ,116	Various types of N-glycan biosynthesis	hexosaminidase	0.022	0.013	0.005	0.038
K01209	3.2.1.55	CAZymes_CE	CE-6,NC	Amino sugar and nucleotide sugar metabolism	alpha-L-arabinofuranosidase	0.02	0.015	0.005	0.032
K15921	3.2.1.55	CAZymes_CE	CE-6,NC	Amino sugar and nucleotide sugar metabolism	arabinoxylan arabinofuranohydrolase	0.004	0.002	0.001	0.005
K01452	3.5.1.41	CAZymes_CE	CE-4	Amino sugar and nucleotide sugar metabolism	chitin deacetylase	0.015	0.014	0.002	0.045
K01443	3.5.1.25	CAZymes_CE	CE-9	Amino sugar and nucleotide sugar metabolism	N-acetylglucosamine-6-phosphate deacetylase	0.087	0.073	0.026	0.231
K13014	3.5.1.-	CAZymes_CE	CE-4,14,18	Amino sugar and nucleotide sugar metabolism	undecaprenyl phosphate-alpha-L-ara4FN deformylase	0.002	0.002	0	0.005
K06880	3.1.1.-	CAZymes_CE	CE-1,2,4,7,12,13,15,17,NC	Antimicrobial resistance genes	erythromycin esterase	0.004	0.004	0.001	0.014
K11931	3.5.1.-	CAZymes_CE	CE-4,14,18	Biofilm formation - Escherichia coli	poly-beta-1,6-N-acetyl-D-glucosamine N-deacetylase	0.01	0.011	0.003	0.028
K11936	2.4.1.-	CAZymes_CE	CE-4	Biofilm formation - Escherichia coli	poly-beta-1,6-N-acetyl-D-glucosamine synthase	0.021	0.02	0.006	0.047
K12990	2.4.1.-	CAZymes_CE	CE-4	Biofilm formation - Pseudomonas aeruginosa	rhamnosyltransferase	0.002	0.002	0	0.004
K12992	2.4.1.-	CAZymes_CE	CE-4	Biofilm formation - Pseudomonas aeruginosa	rhamnosyltransferase	0.004	0.003	0.001	0.012
K18572	3.5.1.-	CAZymes_CE	CE-4,14,18	Carbapenem biosynthesis	putative pantetheine hydrolase	0.003	0.002	0.001	0.009
K10211	2.4.1.-	CAZymes_CE	CE-4	Carotenoid biosynthesis	4,4'-diaponeurosporenoate glycosyltransferase	0.002	0.001	0.001	0.003
K13014	3.5.1.-	CAZymes_CE	CE-4,14,18	Cationic antimicrobial peptide (CAMP) resistance	undecaprenyl phosphate-alpha-L-ara4FN deformylase	0.002	0.002	0	0.005
K07046	3.1.1.-	CAZymes_CE	CE-1,2,4,7,12,13,15,17,NC	Fructose and mannose metabolism	L-fuconolactonase	0.012	0.008	0.002	0.021
K02079	3.5.1.25	CAZymes_CE	CE-9	Galactose metabolism	N-acetylgalactosamine-6-phosphate deacetylase	0	0.001	0	0.002
K00635	2.3.1.20	CAZymes_CE	CE-1	Glycerolipid metabolism	diacylglycerol O-acyltransferase / wax synthase	0.003	0.002	0.001	0.008
K01046	3.1.1.3	CAZymes_CE	CE-5	Glycerolipid metabolism	triacylglycerol lipase	0.027	0.023	0.006	0.062
K12984	2.4.1.-	CAZymes_CE	CE-4	Glycosyltransferases	(heptosyl)LPS beta-1,4-glucosyltransferase	0.028	0.021	0.006	0.058
K12988	2.4.1.-	CAZymes_CE	CE-4	Glycosyltransferases	alpha-1,3-rhamnosyltransferase	0.007	0.006	0.002	0.012
K14335	2.4.1.-	CAZymes_CE	CE-4	Glycosyltransferases	alpha-1,6-mannosyltransferase	0.033	0.025	0.007	0.072
K00786	2.4.1.-	CAZymes_CE	CE-4	Glycosyltransferases	beta-1,6-galactosyltransferase	0.008	0.006	0.002	0.017
K13688	2.4.1.-	CAZymes_CE	CE-4	Glycosyltransferases	cyclic beta-1,2-glucan synthetase	0.016	0.014	0.003	0.025
K13007	2.4.1.-	CAZymes_CE	CE-4	Glycosyltransferases	Fuc2NAc and GlcNAc transferase	0.013	0.007	0.003	0.021
K13004	2.4.1.-	CAZymes_CE	CE-4	Glycosyltransferases	galacturonosyltransferase WbtD	0.002	0.002	0.001	0.006
K12999	2.4.1.-	CAZymes_CE	CE-4	Glycosyltransferases	glucosyltransferase	0	0	0	0.002
K13002	2.4.1.-	CAZymes_CE	CE-4	Glycosyltransferases	glycosyltransferase	0.003	0.001	0.001	0.004
K19354	2.4.1.-	CAZymes_CE	CE-4	Glycosyltransferases	heptose III glucuronosyltransferase	0.004	0.005	0.001	0.012
K12994	2.4.1.-	CAZymes_CE	CE-4	Glycosyltransferases	mannosyl-N-acetyl-alpha-D-glucosaminyl-diphospho-ditrans,octacis-undecaprenol 3-alpha-mannosyltransferase / alpha-1,3-rhamnosyltransferase	0.045	0.034	0.013	0.091
K12989	2.4.1.-	CAZymes_CE	CE-4	Glycosyltransferases	mannosyltransferase	0.003	0.003	0.001	0.008
K03669	2.4.1.-	CAZymes_CE	CE-4	Glycosyltransferases	membrane glycosyltransferase	0.015	0.012	0.002	0.038
K12995	2.4.1.-	CAZymes_CE	CE-4	Glycosyltransferases	N-acetyl-alpha-D-glucosaminyl-diphospho-ditrans,octacis-undecaprenol 3-alpha-mannosyltransferase / rhamnosyltransferase	0.003	0.003	0.001	0.009
K12993	2.4.1.-	CAZymes_CE	CE-4	Glycosyltransferases	O-antigen biosynthesis alpha-1,2-mannosyltransferase/rhamnosyltransferase	0.003	0.003	0.001	0.006
K12583	2.4.1.-	CAZymes_CE	CE-4	Glycosyltransferases	phosphatidylinositol alpha 1,6-mannosyltransferase	0.015	0.011	0.005	0.038
K11936	2.4.1.-	CAZymes_CE	CE-4	Glycosyltransferases	poly-beta-1,6-N-acetyl-D-glucosamine synthase	0.021	0.02	0.006	0.047
K12996	2.4.1.-	CAZymes_CE	CE-4	Glycosyltransferases	rhamnosyltransferase	0.002	0.001	0	0.003
K12990	2.4.1.-	CAZymes_CE	CE-4	Glycosyltransferases	rhamnosyltransferase	0.002	0.002	0	0.004
K12997	2.4.1.-	CAZymes_CE	CE-4	Glycosyltransferases	rhamnosyltransferase	0.003	0.002	0.001	0.007
K12992	2.4.1.-	CAZymes_CE	CE-4	Glycosyltransferases	rhamnosyltransferase	0.004	0.003	0.001	0.012
K02840	2.4.1.-	CAZymes_CE	CE-4	Glycosyltransferases	UDP-D-galactose(glucosyl)LPS alpha-1,6-D-galactosyltransferase	0.001	0.001	0	0.002
K02844	2.4.1.-	CAZymes_CE	CE-4	Glycosyltransferases	UDP-glucose(heptosyl)LPS alpha-1,3-glucosyltransferase	0.03	0.03	0.008	0.073
K03867	2.4.1.-	CAZymes_CE	CE-4	Glycosyltransferases	UDP-glucosetetrahydrobiopterin glucosyltransferase	0.002	0.001	0	0.003
K14335	2.4.1.-	CAZymes_CE	CE-4	Lipoarabinomannan (LAM) biosynthesis	alpha-1,6-mannosyltransferase	0.033	0.025	0.007	0.072
K12976	3.1.1.-	CAZymes_CE	CE-1,2,4,7,12,13,15,17,NC	Lipopolysaccharide biosynthesis	lipid A 3-O-deacylase	0.001	0.001	0	0.004
K02847	2.4.1.-	CAZymes_CE	CE-4	Lipopolysaccharide biosynthesis	O-antigen ligase	0.003	0.004	0.001	0.009
K02535	3.5.1.108	CAZymes_CE	CE-11	Lipopolysaccharide biosynthesis	UDP-3-O-3-hydroxymyristoyl] N-acetylglucosamine deacetylase	0.096	0.072	0.021	0.183
K02840	2.4.1.-	CAZymes_CE	CE-4	Lipopolysaccharide biosynthesis	UDP-D-galactose(glucosyl)LPS alpha-1,6-D-galactosyltransferase	0.001	0.001	0	0.002
K02844	2.4.1.-	CAZymes_CE	CE-4	Lipopolysaccharide biosynthesis	UDP-glucose(heptosyl)LPS alpha-1,3-glucosyltransferase	0.03	0.03	0.008	0.073
K12984	2.4.1.-	CAZymes_CE	CE-4	Lipopolysaccharide biosynthesis proteins	(heptosyl)LPS beta-1,4-glucosyltransferase	0.028	0.021	0.006	0.058
K12988	2.4.1.-	CAZymes_CE	CE-4	Lipopolysaccharide biosynthesis proteins	alpha-1,3-rhamnosyltransferase	0.007	0.006	0.002	0.012
K13007	2.4.1.-	CAZymes_CE	CE-4	Lipopolysaccharide biosynthesis proteins	Fuc2NAc and GlcNAc transferase	0.013	0.007	0.003	0.021
K13004	2.4.1.-	CAZymes_CE	CE-4	Lipopolysaccharide biosynthesis proteins	galacturonosyltransferase WbtD	0.002	0.002	0.001	0.006
K12999	2.4.1.-	CAZymes_CE	CE-4	Lipopolysaccharide biosynthesis proteins	glucosyltransferase	0	0	0	0.002
K13002	2.4.1.-	CAZymes_CE	CE-4	Lipopolysaccharide biosynthesis proteins	glycosyltransferase	0.003	0.001	0.001	0.004
K19354	2.4.1.-	CAZymes_CE	CE-4	Lipopolysaccharide biosynthesis proteins	heptose III glucuronosyltransferase	0.004	0.005	0.001	0.012
K12976	3.1.1.-	CAZymes_CE	CE-1,2,4,7,12,13,15,17,NC	Lipopolysaccharide biosynthesis proteins	lipid A 3-O-deacylase	0.001	0.001	0	0.004
K12994	2.4.1.-	CAZymes_CE	CE-4	Lipopolysaccharide biosynthesis proteins	mannosyl-N-acetyl-alpha-D-glucosaminyl-diphospho-ditrans,octacis-undecaprenol 3-alpha-mannosyltransferase / alpha-1,3-rhamnosyltransferase	0.045	0.034	0.013	0.091
K12989	2.4.1.-	CAZymes_CE	CE-4	Lipopolysaccharide biosynthesis proteins	mannosyltransferase	0.003	0.003	0.001	0.008
K12995	2.4.1.-	CAZymes_CE	CE-4	Lipopolysaccharide biosynthesis proteins	N-acetyl-alpha-D-glucosaminyl-diphospho-ditrans,octacis-undecaprenol 3-alpha-mannosyltransferase / rhamnosyltransferase	0.003	0.003	0.001	0.009
K12993	2.4.1.-	CAZymes_CE	CE-4	Lipopolysaccharide biosynthesis proteins	O-antigen biosynthesis alpha-1,2-mannosyltransferase/rhamnosyltransferase	0.003	0.003	0.001	0.006
K20444	2.4.1.-	CAZymes_CE	CE-4	Lipopolysaccharide biosynthesis proteins	O-antigen biosynthesis protein	0.09	0.061	0.017	0.162
K02847	2.4.1.-	CAZymes_CE	CE-4	Lipopolysaccharide biosynthesis proteins	O-antigen ligase	0.003	0.004	0.001	0.009
K12996	2.4.1.-	CAZymes_CE	CE-4	Lipopolysaccharide biosynthesis proteins	rhamnosyltransferase	0.002	0.001	0	0.003
K12990	2.4.1.-	CAZymes_CE	CE-4	Lipopolysaccharide biosynthesis proteins	rhamnosyltransferase	0.002	0.002	0	0.004
K12997	2.4.1.-	CAZymes_CE	CE-4	Lipopolysaccharide biosynthesis proteins	rhamnosyltransferase	0.003	0.002	0.001	0.007
K12992	2.4.1.-	CAZymes_CE	CE-4	Lipopolysaccharide biosynthesis proteins	rhamnosyltransferase	0.004	0.003	0.001	0.012
K02535	3.5.1.108	CAZymes_CE	CE-11	Lipopolysaccharide biosynthesis proteins	UDP-3-O-3-hydroxymyristoyl] N-acetylglucosamine deacetylase	0.096	0.072	0.021	0.183
K02840	2.4.1.-	CAZymes_CE	CE-4	Lipopolysaccharide biosynthesis proteins	UDP-D-galactose(glucosyl)LPS alpha-1,6-D-galactosyltransferase	0.001	0.001	0	0.002
K02844	2.4.1.-	CAZymes_CE	CE-4	Lipopolysaccharide biosynthesis proteins	UDP-glucose(heptosyl)LPS alpha-1,3-glucosyltransferase	0.03	0.03	0.008	0.073
K13014	3.5.1.-	CAZymes_CE	CE-4,14,18	Lipopolysaccharide biosynthesis proteins	undecaprenyl phosphate-alpha-L-ara4FN deformylase	0.002	0.002	0	0.005
K08281	3.5.1.-	CAZymes_CE	CE-4,14,18	Nicotinate and nicotinamide metabolism	nicotinamidase/pyrazinamidase	0.041	0.044	0.016	0.128
K01060	3.1.1.41	CAZymes_CE	CE-7	Penicillin and cephalosporin biosynthesis	cephalosporin- deacetylase	0.004	0.003	0.002	0.007
K01728	4.2.2.2	CAZymes_CE	CE-8	Pentose and glucuronate interconversions	pectate lyase	0.003	0.002	0	0.005
K01051	3.1.1.11	CAZymes_CE	CE-8,NC	Pentose and glucuronate interconversions	pectinesterase	0.009	0.006	0.002	0.016
K14665	3.5.1.-	CAZymes_CE	CE-4,14,18	Peptidases and inhibitors	amidohydrolase	0.002	0.002	0.001	0.007
K01436	3.5.1.-	CAZymes_CE	CE-4,14,18	Peptidases and inhibitors	amidohydrolase	0.136	0.1	0.033	0.323
K21613	3.5.1.-	CAZymes_CE	CE-4,14,18	Peptidases and inhibitors	N-acetylcysteine deacetylase	0.059	0.049	0.016	0.172
K08308	4.2.2.-	CAZymes_CE	CE-8	Peptidoglycan biosynthesis and degradation proteins	membrane-bound lytic murein transglycosylase	0	0.001	0	0.002
K08306	4.2.2.-	CAZymes_CE	CE-8	Peptidoglycan biosynthesis and degradation proteins	membrane-bound lytic murein transglycosylase	0.003	0.003	0	0.007
K08304	4.2.2.-	CAZymes_CE	CE-8	Peptidoglycan biosynthesis and degradation proteins	membrane-bound lytic murein transglycosylase A	0.047	0.04	0.006	0.099
K08305	4.2.2.-	CAZymes_CE	CE-8	Peptidoglycan biosynthesis and degradation proteins	membrane-bound lytic murein transglycosylase B	0.048	0.045	0.008	0.123
K08307	4.2.2.-	CAZymes_CE	CE-8	Peptidoglycan biosynthesis and degradation proteins	membrane-bound lytic murein transglycosylase D	0.124	0.097	0.035	0.283
K18691	4.2.2.-	CAZymes_CE	CE-8	Peptidoglycan biosynthesis and degradation proteins	membrane-bound lytic murein transglycosylase F	0.024	0.022	0.007	0.065
K08309	4.2.2.-	CAZymes_CE	CE-8	Peptidoglycan biosynthesis and degradation proteins	soluble lytic murein transglycosylase	0.144	0.122	0.035	0.331
K09023	3.5.1.-	CAZymes_CE	CE-4,14,18	Pyrimidine metabolism	aminoacrylate hydrolase	0.001	0.001	0	0.007
K01728	4.2.2.2	CAZymes_CE	CE-8	Quorum sensing	pectate lyase	0.003	0.002	0	0.005
K12990	2.4.1.-	CAZymes_CE	CE-4	Quorum sensing	rhamnosyltransferase	0.002	0.002	0	0.004
K01179	3.2.1.4	CAZymes_CE	CE-2	Starch and sucrose metabolism	endoglucanase	0.041	0.029	0.009	0.07
K19055	3.1.1.-	CAZymes_CE	CE-1,2,4,7,12,13,15,17,NC	Transfer RNA biogenesis	Ala-tRNA(Pro) deacylase	0.013	0.012	0.002	0.032
K07050	3.1.1.-	CAZymes_CE	CE-1,2,4,7,12,13,15,17,NC	Transfer RNA biogenesis	misacylated tRNA(Ala) deacylase	0.005	0.005	0.001	0.016
K02847	2.4.1.-	CAZymes_CE	CE-4	Transporters	O-antigen ligase	0.003	0.004	0.001	0.009
K21801	3.5.1.-	CAZymes_CE	CE-4,14,18	Tryptophan metabolism	indoleacetamide hydrolase	0.006	0.006	0.002	0.02
K01179	3.2.1.4	CAZymes_CE	CE-2	Two-component system	endoglucanase	0.041	0.029	0.009	0.07
K01051	3.1.1.11	CAZymes_CE	CE-8,NC	Two-component system	pectinesterase	0.009	0.006	0.002	0.016
K01218	3.2.1.78	CAZymes_AA	AA-10	Fructose and mannose metabolism	mannan endo-1,4-beta-mannosidase	0.006	0.004	0.002	0.01
K01218	3.2.1.78	CAZymes_AA	AA-10	Quorum sensing	mannan endo-1,4-beta-mannosidase	0.006	0.004	0.002	0.01
K05539	1.-.-.-	CAZymes_AA	AA-8,12	Transfer RNA biogenesis	tRNA-dihydrouridine synthase A	0.047	0.042	0.011	0.119
K05540	1.-.-.-	CAZymes_AA	AA-8,12	Transfer RNA biogenesis	tRNA-dihydrouridine synthase B	0.189	0.146	0.047	0.43
K05541	1.-.-.-	CAZymes_AA	AA-8,12	Transfer RNA biogenesis	tRNA-dihydrouridine synthase	0.024	0.022	0.005	0.056
K08351	1.-.-.-	CAZymes_AA	AA-8,12	Biotin metabolism	biotin/methionine sulfoxide reductase	0.01	0.01	0.002	0.032
K08351	1.-.-.-	CAZymes_AA	AA-8,12	Transporters	biotin/methionine sulfoxide reductase	0.01	0.01	0.002	0.032
K10678	1.-.-.-	CAZymes_AA	AA-8,12	Nitrotoluene degradation	nitroreductase	0.001	0.002	0	0.008
K10679	1.-.-.-	CAZymes_AA	AA-8,12	Nitrotoluene degradation	nitroreductase / dihydropteridine reductase	0.01	0.008	0.002	0.027
K10680	1.-.-.-	CAZymes_AA	AA-8,12	Nitrotoluene degradation	N-ethylmaleimide reductase	0.151	0.128	0.038	0.381
K16301	1.11.1.-	CAZymes_AA	AA-2	Transporters	deferrochelatase/peroxidase feB	0.003	0.003	0.001	0.015
K16873	1.1.3.-	CAZymes_AA	AA-5,7	Furfural degradation	5-(hydroxymethyl)furfural/furfural oxidase	0.005	0.004	0	0.012
K16873	1.1.3.47	CAZymes_AA	AA-5	Furfural degradation	5-(hydroxymethyl)furfural/furfural oxidase	0.005	0.004	0	0.012
K19355	3.2.1.78	CAZymes_AA	AA-10	Fructose and mannose metabolism	mannan endo-1,4-beta-mannosidase	0.002	0.001	0	0.002
